1 **Implications of critical nodes-dependent unidirectional cross-talk**  
2 **between Plasmodium and Human SUMO pathway proteins in**  
3 **Plasmodium infection**

4

5 **Keywords:** SUMOylation, SUMO-Ubc9 interface, *Plasmodium falciparum*, host-parasite  
6 interaction, cross-species interaction

7

8 **Abstract**

9 The endoparasitic pathogen, *Plasmodium falciparum* (Pf), modulates protein-protein  
10 interactions to employ post-translational modifications like SUMOylation in order to  
11 establish successful infections. The interaction between E1 and E2 (Ubc9) enzymes  
12 governs species specificity in the Plasmodium SUMOylation pathway. Here, we  
13 demonstrate that a unidirectional cross-species interaction exists between Pf-SUMO  
14 and Human-E2, whereas Hs-SUMO1 failed to interact with Pf-E2. Biochemical and  
15 biophysical analysis revealed that surface-accessible Aspartates of Pf-SUMO determine  
16 the efficacy and specificity of SUMO-Ubc9 interactions. Furthermore, we demonstrate  
17 that critical residues of the Pf-Ubc9 N-terminal are responsible for the lack of interaction  
18 between Hs-SUMO1 and Pf-Ubc9. Mutating these residues to corresponding Hs-Ubc9  
19 residues restore electrostatic,  $\pi$ - $\pi$ , and hydrophobic interactions and allows efficient  
20 cross-species interactions. We suggest that the critical changes acquired on the  
21 surfaces of *Plasmodium* SUMO and Ubc9 proteins as nodes can help *Plasmodium*  
22 exploit the host SUMOylation machinery. Thus, Pf-SUMO interactions can be targeted  
23 for developing antimalarials.

24

## 25 Introduction

26 Protein-protein interaction interfaces are crucial for delineating molecular recognition  
27 principles, protein association mechanisms, and post-translational modifications  
28 (PTM)<sup>1-4</sup>. Parasites often challenge fidelity in target recognition and modifications to  
29 develop an infection, survive in the adverse host cellular milieu, and evade the host  
30 immune response<sup>5-8</sup>. *Plasmodium falciparum*, known to inflict cerebral malaria in  
31 humans, adopts several strategies, including PTMs for infection and survival<sup>9-</sup>  
32 <sup>12</sup>. SUMOylation, a post-translational modification similar to ubiquitination, is carried out  
33 by a cascade of enzymes, heterodimeric E1 activating (Uba2/Aos1) and E2 conjugating  
34 (Ubc9) enzymes, to covalently link the ubiquitin-like polypeptide SUMO to a lysine  
35 residue present on the substrate protein. SUMO modified proteins are efficiently  
36 deconjugated by sentrin proteases (SENP). SUMOylation pathway enzymes interact  
37 non-covalently as well as form a covalent bond with SUMO<sup>13-17</sup>. Detailed studies  
38 suggest that non-covalent interactions exist between SUMO and E2 enzymes involving  
39 key residues present at the interaction interface<sup>18,19</sup>. Structural and biochemical studies  
40 on the *Plasmodium* SUMOylation pathway suggest that the cognate E1 and E2 enzyme  
41 interactions strictly govern the species specificity<sup>11</sup>. Crucial surface residues on E1 and  
42 E2 enzymes were mapped as critical nodes governing the pathway-specificity.

43  
44 Interestingly, disrupting E1-E2 interaction is suggested as an attractive strategy for  
45 developing parasite-specific inhibitors<sup>20,21</sup>. Moreover, studies from various parasites  
46 indicate that parasite toxin targets host Ubc9, compromising overall SUMOylation levels  
47 for successful infection<sup>22,23</sup>. *Plasmodium* has elaborate SUMOylation machinery  
48 components, and interestingly Pf-SUMO has been found in the cytosol of RBC<sup>9</sup>. *In vitro*  
49 results argue that Pf-SUMO can modify a model substrate in the presence of Human E1  
50 and E2 enzymes<sup>10,11,24</sup>. Accordingly, small-molecule Pf-SENP1 inhibitor VE-260  
51 affected SUMO processing, inhibited *Plasmodium* replication, and blocked RBC  
52 rupture<sup>25</sup>. These observations motivated our investigation of SUMO-E2 interactions and  
53 their relevance in host-pathogen (human-*Plasmodium*) interactions.

54  
55 Here, we provide a detailed account of Pf-SUMO and Ubc9 interactions and map critical  
56 amino acids present on both the proteins as nodes involved in cross-species and  
57 species-specific SUMO-Ubc9 interaction. We determined the solution structure of  
58 *Plasmodium* SUMO using NMR spectroscopy and suggest that Pf-SUMO and human  
59 SUMOs have similar structural arrangements. Next, we delineate a molecular-level  
60 understanding of the distinction in interactions between SUMO and E2 proteins by  
61 combining biophysical and biochemical approaches. We demonstrate that Pf-SUMO  
62 interacts with Hs-E2 albeit with lower affinity; however, Hs-SUMO1 failed to interact  
63 with Pf-E2. We also demonstrate that negatively charged Aspartate residues (D68 and  
64 D90) of Pf-SUMO, part of the interaction interface, serve as critical nodes and play an

65 essential role in the Pf-SUMO-Ubc9 interaction. Pf-Ubc9 discriminates Pf-SUMO from  
66 Hs-SUMO via  $\pi$ - $\pi$ , hydrophobic and charge-based interactions, mediated by Alanine 13,  
67 Glutamate 14, and Alanine 21 residues in the N-terminus of Pf-Ubc9. Combining  
68 structural, biochemical, and *in cellulo* observations, we suggest that Pf-SUMO interacts  
69 with and utilizes human SUMOylation pathway enzymes. We propose that Pf-SUMO  
70 interactions in RBC cytosol can help Plasmodium exploit the host SUMOylation pathway  
71 for sustained infection. In addition, targeting Pf-SUMO interactions can help in  
72 developing antimalarials.

73

## 74 RESULTS

75

### 76 Pf-SUMO displays competitive inter-species interaction with Hs-Ubc9

77 To develop a precise understanding of host-pathogen (human-*Plasmodium*) interaction,  
78 we examined SUMO-Ubc9 interfaces. Alignment of Pf-SUMO against human SUMO  
79 paralogs exhibited sequence identities of 41 % with Hs-SUMO1, 45% with Hs-SUMO2,  
80 and 46% with Hs-SUMO3 (Supplementary Fig. 1 a). Next, isothermal titration  
81 calorimetry (ITC) dependent probing of SUMO-Ubc9 interactions suggested that the  
82 binding between Pf-SUMO and Pf-Ubc9 is exothermic and enthalpy-driven, with entropy  
83 contributing favorably. The heat exchange profiles fitted well to one-site binding models,  
84 indicating single-site binding between the two proteins. The  $K_d$  value for the Pf-  
85 SUMO: Pf-E2 interaction was determined to be  $4.05 \pm 0.17 \mu\text{M}$  indicating a strong  
86 interaction. The  $K_d$  value of  $27.42 \pm 1.97 \mu\text{M}$  for Pf-SUMO: Hs-Ubc9 indicated an order of  
87 magnitude weaker binding affinity (Fig. 1 a, b and Supplementary Table 1). Similarly,  
88 the  $K_d$  value of  $4.18 \pm 0.2 \mu\text{M}$  for the Hs-SUMO1: Hs-E2 interaction suggested a robust  
89 exothermic mode of binding between them (Supplementary Table 1). Interestingly, no  
90 measurable thermodynamic parameters were observed for the Hs-SUMO1: Pf-Ubc9  
91 interaction pair (Fig. 1 c,d). Using Surface Plasmon Resonance, we next compared the  
92 binding affinities between Plasmodium and human SUMO proteins with E2 proteins  
93 (Hs-Ubc9 and Pf-Ubc9). The binding constant derived herein corroborated with the ITC  
94 data, with slight changes in the  $K_d$  values (Supplementary Fig. 2). The thermodynamic  
95 parameters for the interaction between proteins have been summarized in the  
96 Supplementary Table 1. Collectively, these findings suggested that Pf-SUMO exhibits  
97 intra- as well as inter-species interaction with E2s. However, Hs-SUMO1 exhibited only  
98 intra-species interaction with Hs-Ubc9.

99 We next explored the residue-specific information on the interactions between Pf-SUMO  
100 and Hs-SUMO1 with the Ubc9 enzymes. We purified these proteins (Supplementary  
101 Fig. 1 b) and recorded a set of 2D  $^{15}\text{N}$ - $^1\text{H}$  heteronuclear single quantum coherence

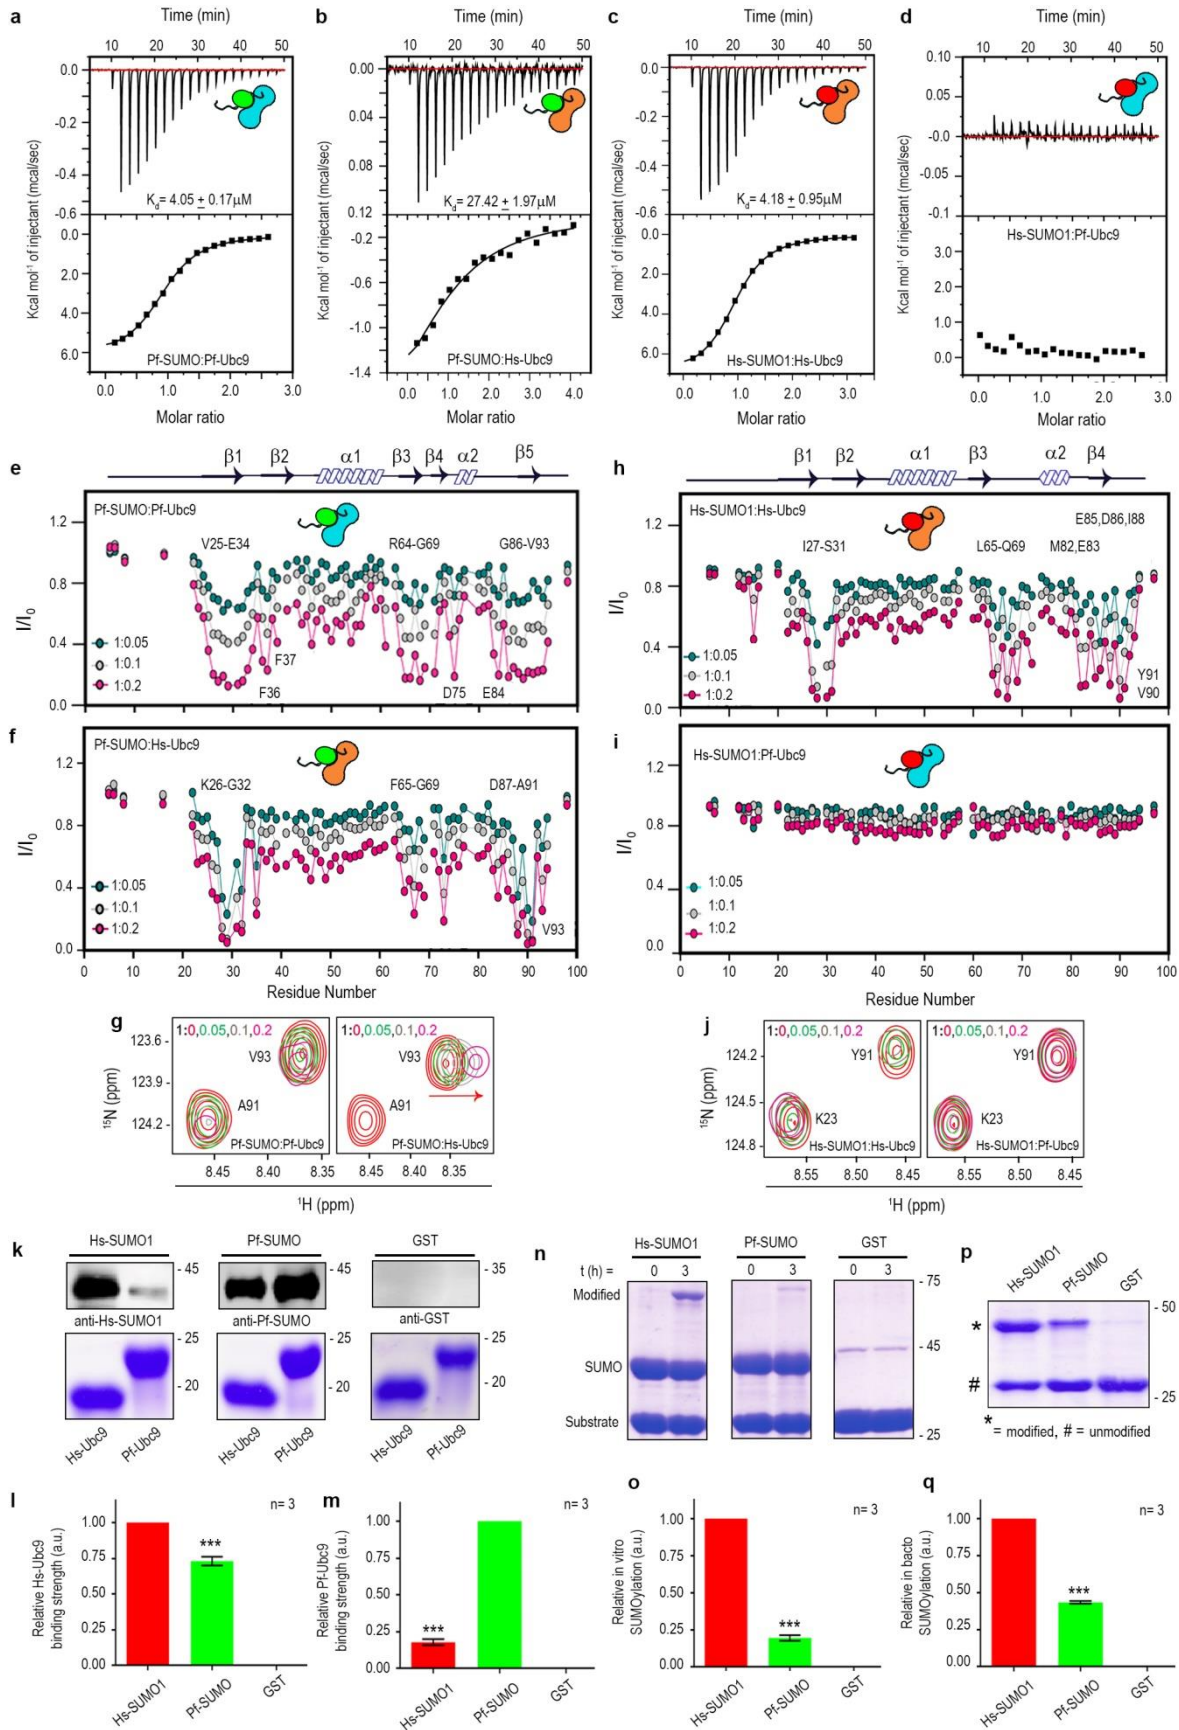



103 **Fig.1: *Plasmodium* SUMO exhibits strong cross-reactivity with human Ubc9**  
104 **enzyme**

105 Thermodynamic binding analysis utilizing ITC for Pf-SUMO with Pf-Ubc9 **(a)**, Pf-SUMO  
106 with Hs-Ubc9 **(b)**, Hs-SUMO1 with Hs-Ubc9 **(c)**, and Hs-SUMO1 with Pf-Ubc9 **(d)**. The  
107 upper panels represent the raw data, and the corresponding lower panels indicate the  
108 curve fitting of the graph to extract thermodynamic parameters. Intensity profile ( $I/I_0$ ) of  
109 amide cross-peaks obtained from  $^{15}\text{N}$ - $^1\text{H}$  HSQC spectra at different ratios of SUMO  
110 and Ubc9 (1:0.05, dark cyan; 1:0.1, gray; 1:0.2 pink) for Pf-SUMO-Pf-Ubc9 **(e)** and Pf-  
111 SUMO-Hs-Ubc9 **(f)** pairs. **(g)** Excerpts of selected peaks from Pf-SUMO interactions as  
112 observed in (e) and (f). Similar analysis as in **e** and **f** but Hs-SUMO1 with Hs-Ubc9 **(h)**  
113 and Hs-SUMO1 with Pf-Ubc9 **(i)**. **(j)** Excerpts of selected peaks from Hs-SUMO1  
114 interactions as observed in (h) and (i). Overlay  $^{15}\text{N}$ - $^1\text{H}$  heteronuclear single-quantum  
115 coherence (HSQC) spectra of Pf-SUMO with Ubc9 enzymes at a ratio of 1: 0.0, 0.05,  
116 0.1, 0.2, i.e. free state (black colour) to the bound state. Arrow indicates the direction of  
117 chemical shift perturbations. **(k)** *In vitro* binding assay for Pf-SUMO and Hs-SUMO1  
118 with human and plasmodium Ubc9s. GST is used as a negative control for binding  
119 analysis. Upper panels show western blotting with respective  $\alpha$ -SUMO antibodies, and  
120 lower panels represent coomassie stained gels showing Ubc9s used for pulldown. The  
121 quantification of SUMO binding affinities as seen in (k) with Hs-Ubc9 **(l)** and Pf-Ubc9  
122 **(m)**. **(n)** *In vitro* SUMOylation with Hs-SUMO1 and Pf-SUMO in the presence of purified  
123 human SUMOylation machinery components and a standard peptide substrate and the  
124 quantification of the same in (n) **(o)**. GST serves as a negative control. *In bacto*  
125 SUMOylation with Hs-SUMO1 and Pf-SUMO in the presence of human SUMOylation  
126 machinery and a standard peptide substrate expressed inside bacteria **(p)** and the  
127 quantification of the same in (p) **(q)**. GST serves as a negative control. All statistical  
128 analysis was carried out using GraphPad Prism 8.4.3. Column analysis of data sets  
129 carried out by One-way ANOVA (nonparametric). Dunnett's test was used for multiple  
130 comparisons. Family-wise significance and confidence level is  $p < 0.001$ . Simple  
131 cartoons above relevant panels represent Hs-SUMO1 (red), Pf-SUMO (green), Hs-Ubc9  
132 (orange), and Pf-Ubc9 (cyan).

133

134 (HSQC) spectra on  $^{15}\text{N}$  labeled Pf-SUMO (250  $\mu\text{M}$ ) and then titrated with increasing  
135 concentration (0.05, 0.1, 0.2, 0.4, 0.6 molar equivalent) of unlabeled Pf-Ubc9 and Hs-  
136 Ubc9. Position of resonance peaks may shift or reduce in intensity due to protein-  
137 protein interaction. Further, chemical shift perturbation (CSP) and effects of protein-  
138 complex tumbling indicate binding strengths<sup>26,27</sup>. For Pf-SUMO's titration with Pf-Ubc9  
139 (Supplementary Fig. 3 a), most cross-peaks disappeared, and very few cross-peaks  
140 shifted when Pf-Ubc9 concentration was increased from 0.05 to 0.2 molar ratio. A  
141 significant decrease in peak intensities was observed for the residues V25-A33 and F37

142 located at the structured region of N-terminus, R64-G69, R71, and D75 in the middle  
143 region G86-V93 in the C-terminus of Pf-SUMO (Fig. 1 e and Supplementary Fig. 3 a).  
144 Beyond a molar ratio of 0.2, most peaks disappeared, indicating a stronger binding  
145 between proteins in the intermediate exchange regime at the NMR time-scale<sup>27</sup>.  
146 Similarly, for Pf-SUMO's titration with Hs-Ubc9, we observed a considerable shift or  
147 disappearance in resonances of a significant number of cross-peaks. The prominent  
148 regions with intensity decrease and/or CSP were clustered around Pf-SUMO residues  
149 K26-G32, V35 in the N-terminus, F65-G69, H73 in the middle, and D87-A91 in the C-  
150 terminus (Fig. 1 f and Supplementary Fig. 3 b). Interestingly, the same region of Pf-  
151 SUMO appeared to show interaction with the Hs-Ubc9 barring few residues, which may  
152 be critical for differential interaction strength. The excerpts of the intra- and interspecies  
153 interaction of Pf-SUMO are shown in Fig. 1 g. Pf-SUMO:Hs-Ubc9 interactions  
154 demonstrated significant CSPs suggesting that these interactions occur in an  
155 intermediate to fast exchange regime at the NMR time scale<sup>28</sup>. Similarly, the titration  
156 experiments for Hs-SUMO1 with Ubc9 enzymes suggested strong interaction with most  
157 of the cross-peaks disappearing and observation of CSPs for very few cross-peaks at  
158 different titration ratios (Fig. 1 h and Supplementary Fig. 3 c). A significant decrease in  
159 the intensity due to line broadening was observed in similar regions (viz, N-terminus,  
160 middle and C-terminal region) of Hs-SUMO's, as seen in Pf-SUMO:Ubc9 interaction.  
161 Interestingly, for Hs-SUMO1:Ubc9 interaction, neither a peak shift nor peak  
162 disappearance was observed (Fig. 1 i and Supplementary Fig. 3 d). The excerpts from  
163 the intra- and interspecies interaction of Hs-SUMO1 are shown in Fig. 1 j.

164 Next, we asked if these biophysical assessments of intra- and interspecies SUMO-Ubc9  
165 interactions were biochemically and functionally relevant. We immobilized SUMO on an  
166 affinity column and passed E2 proteins over the beads to assess *in vitro* binding.  
167 Protein pulldown assays demonstrate strong intra-species interaction between SUMO  
168 and Ubc9. In assays of inter-species SUMO-Ubc9 interactions, the Pf-SUMO was  
169 observed to bind Hs-Ubc9 with significant affinity. In contrast, Hs-SUMO1 failed to  
170 display appreciable interactions with Pf-Ubc9 (Fig. 1 k). Quantification of these  
171 observations suggests that the relative affinity of the Pf-SUMO:Hs-Ubc9 interaction is  
172 ~67%, in contrast to the ~12% relative binding affinity of Hs-SUMO1:Ubc9 (Fig. 1  
173 l,m). Next, we assessed the functionality of Pf-SUMO:Hs-Ubc9 interaction through an *in*  
174 *vitro* and *in bacto* (SUMOylation inside bacteria) SUMOylation reaction in the presence  
175 of SUMO machinery and a standard substrate (Supplementary Fig. 4). The *in vitro* and  
176 *in bacto* SUMOylation reactions suggested that using human SUMOylation machinery,  
177 Pf-SUMO can SUMOylate the substrate but at a ~five-fold lesser efficiency than Hs-  
178 SUMO1 (Fig. 1 n-q). In comparison, Pf-SUMO mediated *in bacto* SUMOylation was  
179 ~two-fold more efficient than *in vitro* SUMOylation, probably due to the prolonged  
180 duration of the SUMOylation reaction. Together, the biophysical (NMR, ITC, and SPR),

181 biochemical (pulldown), and functional (SUMOylation) analyses establish significant  
182 interaction between Pf-SUMO:Hs-Ubc9.

183

### 184 **Pf-SUMO shares structural conservation with Hs-SUMO paralogs and Ubc9** 185 **interaction interface**

186 Several protein-protein complexes are characterized by shape complementarity  
187 recognition at the interface (Supplementary Fig. 5 a). Knowing Pf-SUMO's three-  
188 dimensional structure is necessary to precisely understand the details of interactions  
189 that exist during cross-species recognition of Pf-SUMO and Hs-SUMO1 by Ubc9. Using  
190 conventional NMR experiments (as detailed in the method section) and distance  
191 restraints, we determined the 3D structure of Pf-SUMO in solution. The cartoon  
192 representation of the lowest energy structure (Supplementary Fig. 6 a,b) and the wire  
193 representations of the final ensemble of Pf-SUMO's ten structures are shown in (Fig. 2  
194 a). The pairwise RMSD for the ordered regions (aa 22-98) of the final ensemble of the  
195 ten lowest energy structures was 0.61 Å. The atomic coordinates for all ten Pf-SUMO  
196 protein structures have been deposited in the PDB (PDB code: 5GJL). The rest of the  
197 structural parameters and quality of the Pf-SUMO structure is summarized in  
198 (Supplementary Table 2). Briefly, the solution structure of Pf-SUMO has a conserved  
199 SUMO fold, consisting of a four-stranded mixed  $\beta$ -sheet, one helix, and one helical turn.  
200 The strand ordering is  $\beta 2$ - $\beta 1$ - $\beta 4$ - $\beta 3$ , in which the two central strands ( $\beta 1$ - $\beta 4$ ) are parallel  
201 and strands ( $\beta 2$ - $\beta 1$  and  $\beta 3$ - $\beta 4$ ) run antiparallel to each other (Fig. 2 b).

202 We evaluated the structural differences between Pf-SUMO and Hs-SUMO paralog  
203 structures and superimposed the NMR structure of Pf-SUMO over those of human  
204 SUMO1 (PDB ID: 2N1V, RMSD = 1.65 Å) and human SUMO2 (PDB ID: 2N1W, RMSD  
205 = 1.69 Å), respectively (Fig. 2 c,d). The Pf-SUMO showed high structural alignment with  
206 the Hs-SUMO1. Even though the overall fold was the same for these proteins, small  
207 structural differences between the structure of Pf-SUMO and Hs-SUMO1/2 appeared in  
208 the loop regions: R28-D31 (between  $\beta 1$ - $\beta 2$ ), D68-D70 (between  $\beta 3$ - $\beta 4$ ), D75 ( $\alpha 2$  helical  
209 turn), and D85-D87 (in the  $\beta 5$  region of C-terminus).

210 Detailed assessment of SUMO-Ubc9 complexes showed that the interaction between  
211 these proteins is primarily charge-dependent, where the positively charged N-terminal of  
212 Ubc9 interacts with the negatively charged C-terminal pocket of SUMO<sup>19,29</sup>  
213 (Supplementary Fig. 5 b). In the previous section, we have reported distinct regions of  
214 interaction between SUMO and Ubc9. All Pf-SUMO residues involved in interaction with  
215 Pf-Ubc9 and Hs-Ubc9 enzymes have been demarcated in salmon colour (Fig. 2 e,f).  
216 The NMR-derived structure of Pf-SUMO was docked with Ubc9 proteins using the  
217 HADDOCK 2.2 server. The docked complex structures were stabilized by a series of H-

218 bonds as well as salt bridges. The structural details of the interface residues of Pf-  
219 SUMO with Ubc9 enzymes have been summarized (Supplementary Fig. 6 c,d). Upon  
220 comparing the docked complex of Pf-SUMO: Pf-Ubc9 with that of the Pf-SUMO: Hs-  
221 Ubc9, the electrostatic interactions and the H-bond contacts at the interface were found  
222 to be 50% higher for the former complex (Fig. 2 g,h and Supplementary Table 3), which  
223 explains  
224

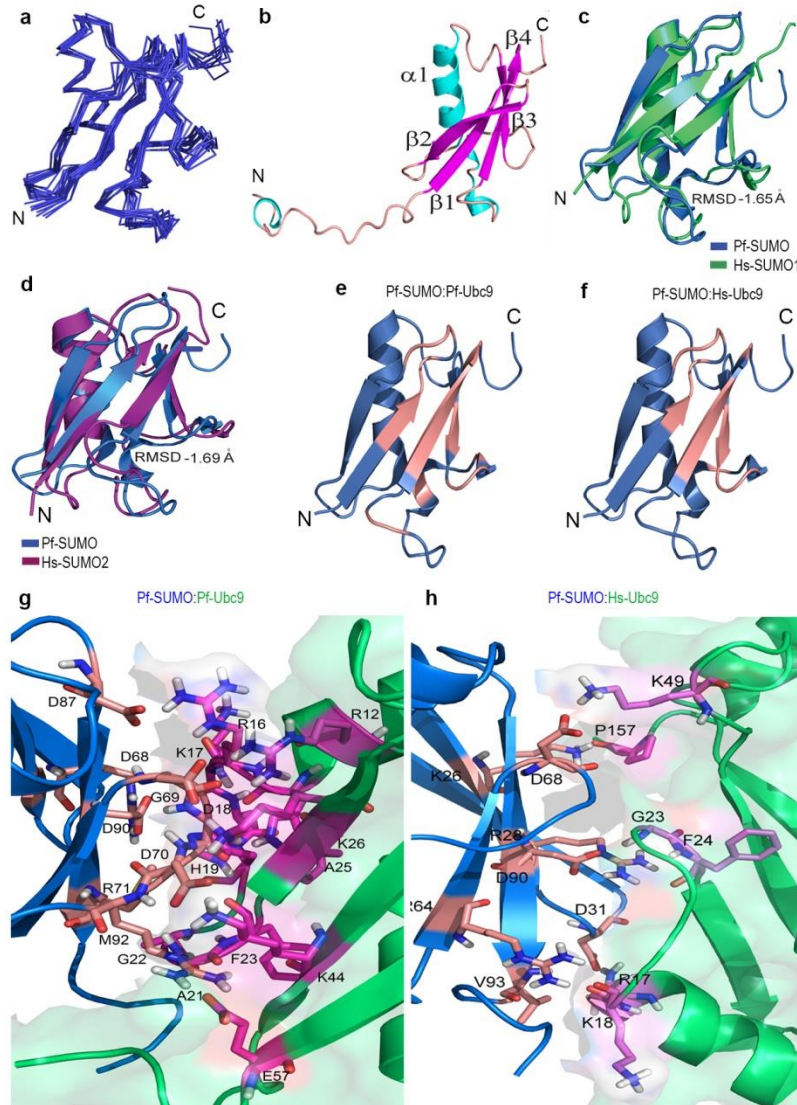

225

226

227 **Fig.2: NMR-derived solution structure of Pf-SUMO and molecular docking of Pf-**  
228 **SUMO protein with E2 enzymes**



229 **a)** Superimposition of backbone traces from the final ensemble of 10 structures with  
230 lowest target function from 22-98 residues. **b)** Cartoon diagram representing the lowest  
231 energy structure of Pf-SUMO. The individual  $\beta$ -strands and  $\alpha$ -helices are labeled. The  
232  $\beta$ -strands are  $\beta$ 1 (I23-V27),  $\beta$ 2 (V35-I39),  $\beta$ 3 (V63-L66), and  $\beta$ 4 (D87-V93); and  $\alpha$ -  
233 helices are  $\alpha$ 1 (L45-L56). **c, d)** Overlap of average Pf-SUMO structure over Hs-SUMO1  
234 and Hs-SUMO2 respectively and calculated RMSD mentioned aligned overlapped  
235 structures. **e, f)** Surface conservation of Pf-SUMO while binding with E2 enzymes.  
236 Salmon colour in Pf-SUMO structure represents the surface residues interacting with Pf-  
237 Ubc9 and Hs-Ubc9 enzymes, respectively, as determined using NMR. **g, h)** Docked  
238 model of Pf-SUMO residues showing interaction with the residues of Pf-Ubc9 and Hs-  
239 Ubc9 enzymes, respectively. The colour coding for Pf-SUMO is blue colour whereas Pf-  
240 Ubc9 and Hs-Ubc9 are green colour respectively. Interacting residues of Pf-SUMO are  
241 in salmon colour, and Pf-Ubc9 and Hs-Ubc9 are in magenta, respectively.

242

243 the reason behind the strong interaction of Pf-SUMO with the Pf-Ubc9 compared to Hs-  
244 Ubc9. Eventually, molecular docking substantiated NMR observation that the negatively  
245 charged residues at positions D68, G69, D87, and D90 in Pf-SUMO, forming a stable  
246 complex with positively charged residues of Ubc9.

247

### 248 **C-terminal region of Pf-SUMO is critically involved in the interaction with Ubc9**

249 SUMO interacts non-covalently on a site located at the back-side of the Ubc9<sup>19,29</sup>. NMR  
250 titration experiments indicated three prominent patches on Pf-SUMO (shown on primary  
251 sequence) required for interaction with Pf-Ubc9 or Hs-Ubc9 (Fig. 3 a). Two of these  
252 patches are present in the C-terminal region centered around D68 and D90 residues.  
253 To establish the importance of Pf-SUMO regions required for interaction with Ubc9, we  
254 generated chimeras between Pf-SUMO and human SUMO1. The Pf-N chimera had  
255 amino acid 1-60 of Pf-SUMO, amino acid 61-97 of Hs-SUMO1, and the Pf-C chimera  
256 had amino acids 1-61 of Hs-SUMO1 and residues 61-98 of Pf-SUMO (Fig. 3 b).  
257 Pulldown of chimera proteins on Hs-Ubc9 and Pf-Ubc9 demonstrated that Pf-N chimera  
258 exhibits stronger interactions with Hs-Ubc9 (Fig. 3 c,d) while the Pf-C chimera did the  
259 same with Pf-Ubc9 (Fig. 3 e,f), indicating a role for the C-terminus in recognition of the  
260 cognate partner. These biochemical results corroborate the findings from the NMR data  
261 and identify two out of the three Ubc9 interacting regions in the Pf-SUMO C-terminal  
262 half. Further, the *in vitro* SUMOylation reactions with SUMO chimera proteins indicated  
263 a significantly improved SUMO modification with Pf-N chimera compared to the Pf-C  
264 chimera (Fig. 3 g,h). While strongly supporting the importance of C-terminal residues of

265 SUMOs in cognate Ubc9 recognition and substrate modification, these results also hint  
 266 at the involvement of N-terminal residues.

267

268

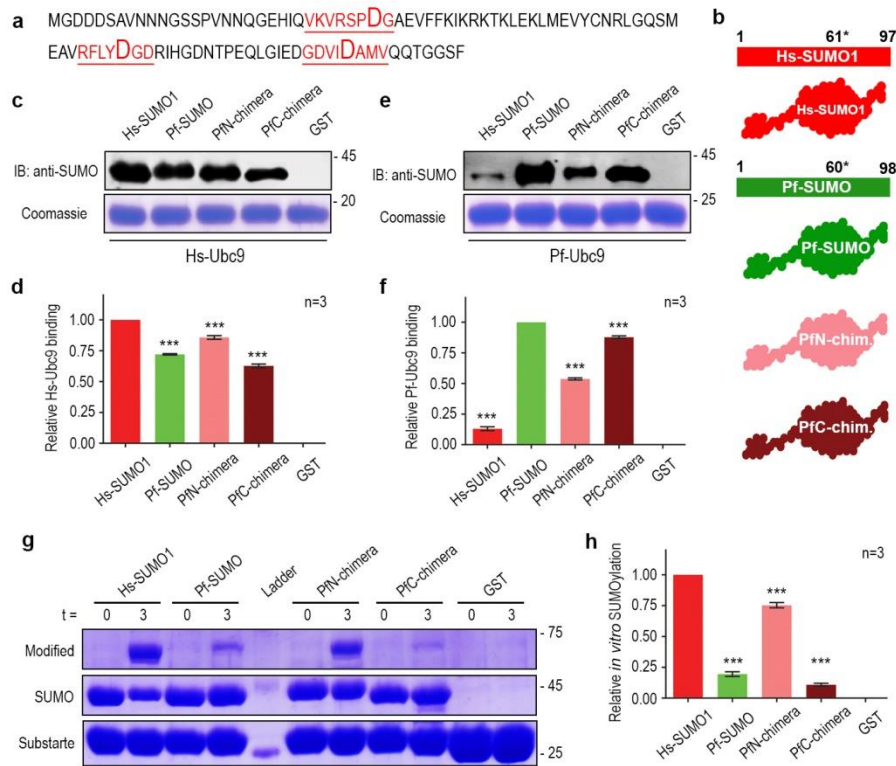

269

270

271 **Fig.3: Contributions from both the amino- and carboxy terminus of Pf-SUMO**  
 272 **facilitates cross-interaction with Hs-Ubc9**

273 **a)** Primary sequence of *Plasmodium* SUMO highlighting Ubc9 interacting patches as  
 274 determined from NMR titration analysis **b)** Schematic representation of Chimera  
 275 generation scheme and cartoon diagram of SUMO chimera proteins. \* (61\* and 60\*)  
 276 indicates the position at which the protein has been divided into two halves to generate  
 277 the chimera (PfN, carrying N-term of Pf-SUMO and PfC, carrying C-term of Pf-SUMO)  
 278 proteins. **c)** *In vitro* binding of chimera proteins over Hs-Ubc9. Upper panels indicate  
 279 anti-SUMO antibody blotting, and the coomassie stained lower panels indicate Hs-Ubc9  
 280 levels. **d)** The graphical representation of quantification of SUMO binding as seen in (c).  
 281 **e and f)** Same as in (c) and (d), respectively, but the pulldown is performed on Pf-Ubc9.  
 282 **g)** *In vitro* SUMOylation with chimera proteins in the presence of purified human  
 283 SUMOylation machinery components and a standard peptide substrate. GST serves as

284 a negative control for the reaction. **h)** The quantification of the observation made in (g).  
285 All experiments are performed at least three times independently. All statistical analysis  
286 was carried out using GraphPad Prism 8.4.3. Column analysis of data sets carried out  
287 by One-way ANOVA (nonparametric). Dunnett's test was used for multiple  
288 comparisons. Family-wise significance and confidence level is  $p < 0.001$ .

### 289 **Conserved Aspartate residues are critical for SUMO-Ubc9 interaction**

290 Several analyses, including the comprehensive mutational analysis of yeast Smt3,  
291 report the importance of C-terminal Aspartate residues in Smt3-Ubc9 interaction, where  
292 mutations in these negatively charged residues of Smt3 abolished interaction with Ubc9  
293 and induced lethality in yeast<sup>30</sup>. Our NMR titration studies suggested three binding  
294 patches centered around K26-D31, Y67-D70, and E84-A91 residues of Pf-SUMO  
295 engaged in Ubc9 interaction (Fig. 1 e,f), where residue D68 and D90 were first to show  
296 intensity decay during titration. Moreover, molecular docking studies analyzing the  
297 interaction of Ubc9s with Pf-SUMO reestablished criticality of Aspartates at position 68  
298 (D68) and at position 90 (D90) in the carboxy-terminal of the Pf-SUMO to be involved in  
299 the stabilization of protein complexes.

300 Point mutants for D31, D68, and D90 residues were generated to validate the criticality  
301 of these residues. These residues were mutated to Alanine; and, D68 and D90 were  
302 mutated to Lysine also. We probed the aspartate (D31, D68, and D90) mutants of Pf-  
303 SUMO for their importance in regulating the interaction with Ubc9s. The quantification of  
304 data from *in vitro* binding with Ubc9s, *in vitro*, and *in bacto* SUMOylation analysis for Pf-  
305 SUMO D31A mutant did not show any observable differences compared with the Pf-  
306 SUMO (Supplementary Fig. 7 a-h). Therefore, we focused on analyzing the aspartate  
307 residues lying in the C-terminal half of the Pf-SUMO. We performed *in vitro* pulldown  
308 assays with Pf-SUMO D68A, D68K, D90A, and D90K mutants and observed that in  
309 comparison to Pf-SUMO, the aspartate mutants, Pf-SUMO D68A, D68K, D90A, and  
310 D90K exhibited a significant reduction (~90%) in their ability to interact with Hs-Ubc9,  
311 with D90 mutants maximally impairing (Fig. 4 a,b). Similarly, in pulldown assay with Pf-  
312 Ubc9, the D68A, D68K, and D90K mutants of Pf-SUMO showed a significant reduction  
313 (80-90%) than Pf-SUMO. Intriguingly, the D90A mutant was unperturbed in its ability to  
314 bind with Pf-Ubc9 (Fig. 4 c,d). A single site binding with the  $K_d$  value of  $2.50 \pm 0.97 \mu\text{M}$   
315 was observed for the Pf-SUMO D90A: Pf-Ubc9 interaction, indicating an unperturbed  
316 interaction matching Pf-SUMO: Pf-Ubc9 levels (Fig. 4 e). SPR thermodynamic  
317 parameters showed a similar binding constant ( $K_d$   $3.02 \pm 0.93 \mu\text{M}$ ) between these  
318 systems (Supplementary Fig. 8 g). The dissociation constant between D90A and Hs-  
319 Ubc9 was found to be ~four-fold weaker than the wildtype (data not shown).

320 We recorded a series of 2D  $\{^{15}\text{N}-^1\text{H}\}$  HSQC spectra on the  $^{15}\text{N}$  labeled Pf-SUMO (WT)  
321 and its mutants (D68A/K and D90A/K) in the free form and the complex state formed

322 during titration with Pf-Ubc9 or Hs-Ubc9. Next, we probed the effect of Pf-SUMO charge  
323 neutralization mutants at the 68<sup>th</sup> and 90<sup>th</sup> positions on Ubc9 binding. At the 0.1 molar  
324 ratio of Pf-Ubc9, significant CSPs for the D68A were observed, confirming a weaker



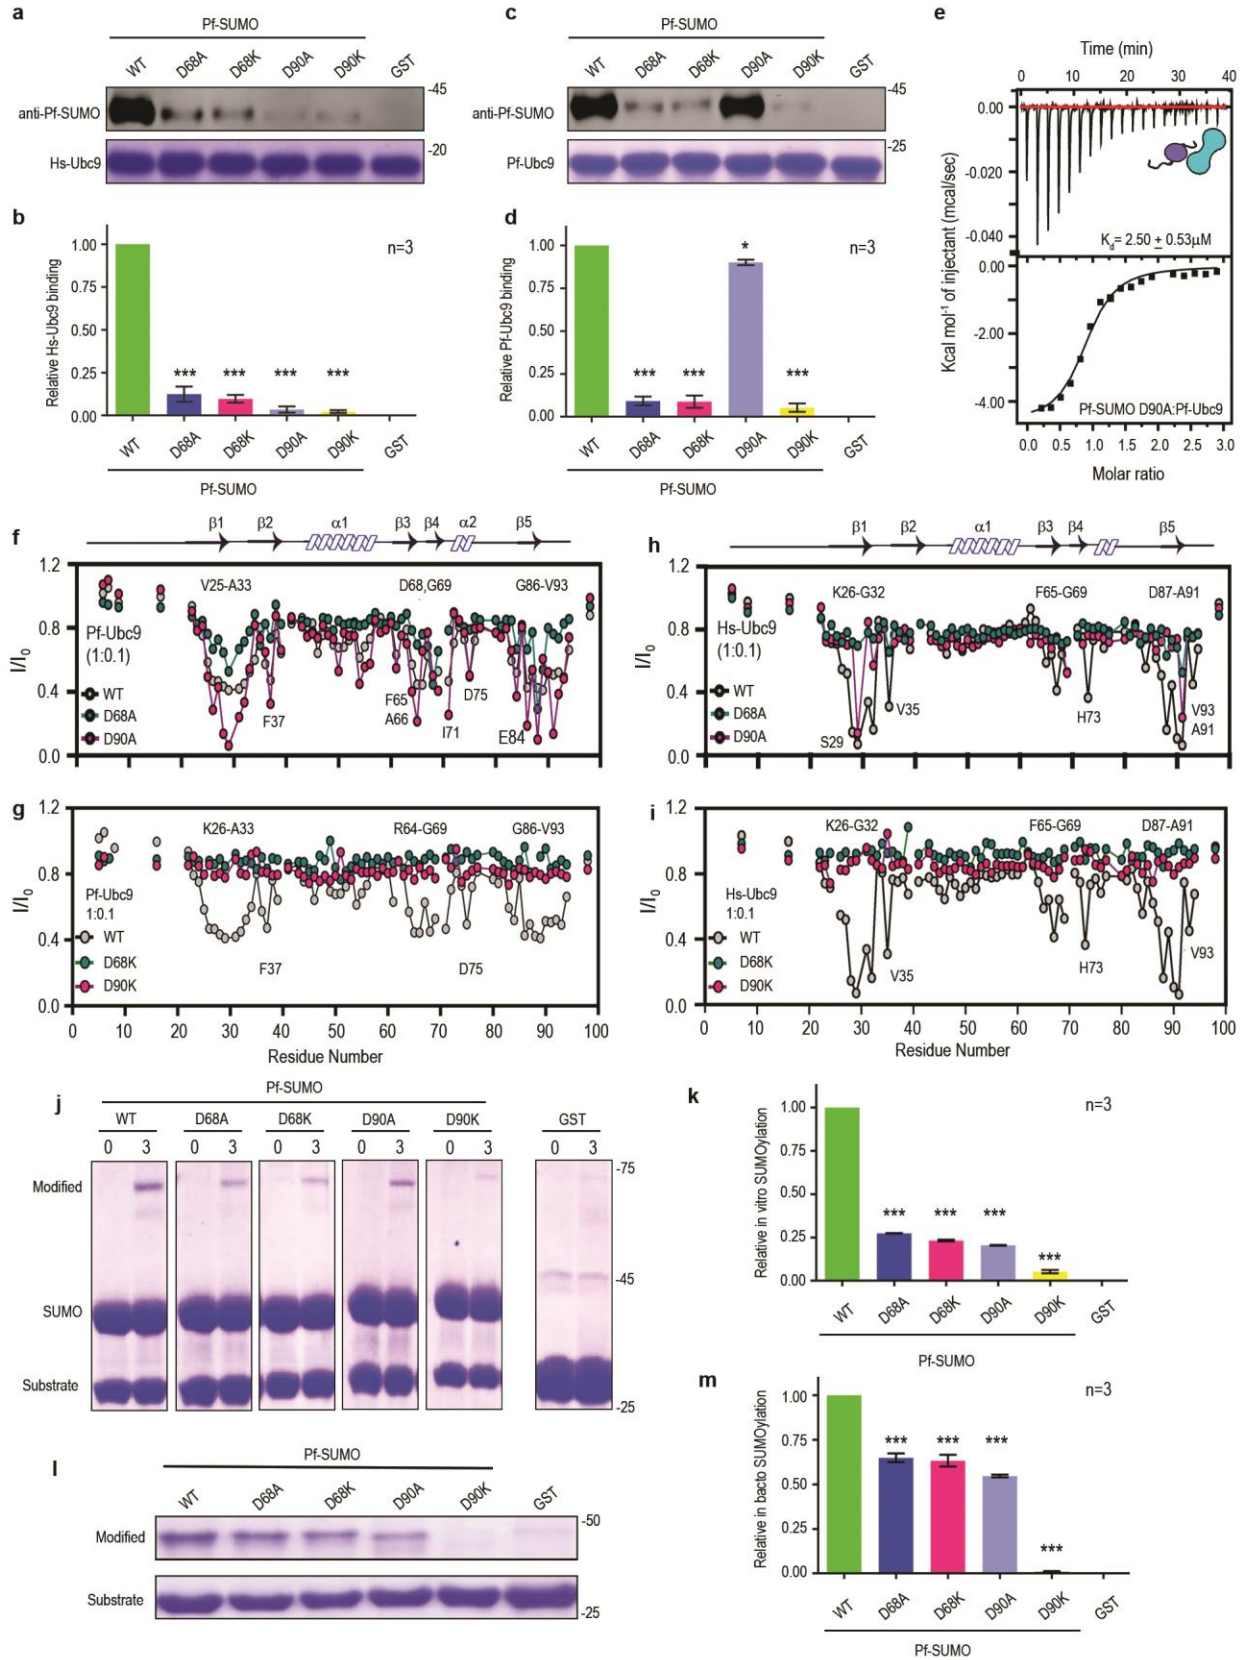

326 **Fig.4: Negatively charged nodes at Aspartate 68 and 90th position govern specific**  
327 **Pf-SUMO interactions with Ubc9**

328 *In vitro* binding assay of Pf-SUMO mutant proteins over Hs-Ubc9 **a)** Upper panels  
329 indicate anti-Pf-SUMO antibody blotting, and the coomassie stained lower panels  
330 indicate Hs-Ubc9 levels. **b)** The quantification of Pf-SUMO binding as seen in (a). **c and**  
331 **d)** Same as in a and b; however, the binding experiments are performed over the Pf-  
332 Ubc9. GST serves as a negative control. **e)** Thermodynamic binding analysis using ITC  
333 for Pf-SUMO D90A mutant with Pf-Ubc9. The upper panels represent the raw data, and  
334 the corresponding lower panels indicate the curve fitting of the graph. **f)** Intensity profile  
335 ( $I/I_0$ ) of amide cross-peaks obtained from  $^{15}\text{N}$ - $^1\text{H}$  HSQC spectra at 1:0.1 ratios of Pf-  
336 SUMO wild type and indicated mutants (Gray; wild type, Green; Pf-SUMO-D68A, Pink;  
337 Pf-SUMO-D90A) with Pf-Ubc9. Arrow indicates the direction of chemical shift  
338 perturbations. **g)** Same as in f, but D68K and D90K mutants of Pf-SUMO along with  
339 wildtype were used in the interaction with Pf-Ubc9. **h and i)** Same as in (f and g);  
340 however, Hs-Ubc9 was used for interaction analysis. **j)** *In vitro* SUMOylation with Pf-  
341 SUMO wildtype and indicated mutants in the presence of purified human SUMOylation  
342 machinery components and a standard peptide substrate. GST serves as a negative  
343 control. **k)** The quantification of the binding as observed in (j). **l)** *In bacto* SUMOylation  
344 with Pf-SUMO wildtype and indicated mutants in the presence of human SUMOylation  
345 machinery components and a standard peptide substrate expressed inside bacteria.  
346 GST serves as a negative control. **m)** The quantification of the binding as observed in  
347 (l). All experiments are performed at least three times independently. All statistical  
348 analysis was carried out using GraphPad Prism 8.4.3. Column analysis of data sets  
349 carried out by One-way ANOVA (nonparametric). Dunnett's test was used for multiple  
350 comparisons. Family-wise significance and confidence level is  $p < 0.001$ . The cartoon  
351 inside figure 4(e) represents Pf-SUMO mutants and Pf-Ubc9 (cyan).

352

353 binding than the wildtype protein (Supplementary Fig 8 a-c). For the D90A mutant, at a  
354 similar molar ratio of 0.1 Pf-Ubc9, substantial line broadening leading to a significant  
355 decrease in intensity was observed in the established three prominent regions of Pf-  
356 SUMO. Furthermore, the decrease in peak intensities for the D90A mutant was ~1.5-  
357 fold higher than that of the wildtype, confirming an equal or even stronger binding than  
358 the wild type. However, the titration analysis for D90A and D68A mutants with Hs-Ubc9  
359 did not show much CSPs other than S29 and A91 residues, suggesting a much weaker  
360 or no binding (Fig. 4 f,h, Supplementary 8 e). Next, charge reversal mutants D68K and  
361 D90K also neither show CSPs nor intensity change upon titration with Pf-Ubc9 or Hs-  
362 Ubc9, indicating critical positioning of these negatively charged residues required for  
363 interaction with Ubc9s (Fig. 4 g,l, Supplementary 8 d,f).

364 Next, we examined the effect of compromised interaction of the D68 and D90 mutants  
365 to SUMOylate using the host SUMOylation machinery. *In vitro* SUMOylation with D68A,  
366 D68K, D90A, and D90K mutants showed a significant reduction in their ability to modify  
367 the substrate (Fig. 4 j,k). Expectedly, the *in bacto* SUMOylation outcomes also indicated  
368 a significant reduction in their ability to modify the substrate (Fig. 4 i,m). The Pf-SUMO  
369 D68A, D68K, and D90A mutants resulted in ~three-fold impairment in their  
370 SUMOylation abilities; the D90K mutant appeared inactive with near-zero SUMOylation  
371 levels. The extent of decreased SUMOylation, under *in vitro* and *in bacto* SUMOylation  
372 reaction conditions, observed with these Pf-SUMO mutants corroborated very well with  
373 the reduction in their ability to interact with Hs-Ubc9. Taken together, we demonstrate  
374 that the Aspartates at positions 68<sup>th</sup> and 90<sup>th</sup> are critical for Ubc9 interaction.

375

### 376 **The divergent N-terminal region of Pf-Ubc9 governs species-specific interactions** 377 **with Pf-SUMO**

378 Structural and biochemical analyses have demonstrated that the N-terminal helix of  
379 Ubc9 is a major player in the non-covalent interaction with SUMO<sup>18,19</sup>. Further, the N-  
380 terminal region of Pf-Ubc9 (aa 1-81) contributed towards species-specificity of E1-E2  
381 interaction<sup>10</sup>. Moreover, our initial results suggested that the Pf-Ubc9 does not interact  
382 with Hs-SUMO1. Therefore, we asked if the sequence diversity in the N-terminal region  
383 of the Pf-Ubc9 does not allow Hs-SUMO1 binding. While Pf-Ubc9 and Hs-Ubc9  
384 exhibited an overall 61% identity (Supplementary Fig. 9 a), alignment of the first 25  
385 amino acids from the N-terminus of Ubc9 from different eukaryotic animals indicated  
386 that Pf-Ubc9 has diverged at specific residues (Supplementary Fig. 9 b). With Alanine,  
387 Glutamate, and Alanine at positions 13, 14, and 21, respectively, a clear divergence can  
388 be observed in the SUMO binding pocket residues of Pf-Ubc9. In comparison, Hs-Ubc9  
389 had Lys, Ala, and Phe residues at equivalent positions. Thus, we reasoned that the  
390 nature of these amino acids at critical nodes of Ubc9 determines the intra- and  
391 interspecies interaction with SUMO. Molecular docking analyses of the SUMO-Ubc9  
392 complex structures clearly demonstrated that electrostatic forces stabilize the interface  
393 residues. The Y91 residue of Hs-SUMO1 forms  $\pi$ - $\pi$  stacking with the F22 residue of Hs-  
394 Ubc9 is also supported by neighboring residues electrostatically (Fig. 5 a). Though Pf-  
395 SUMO: Pf-Ubc9 was stabilized by electrostatic and hydrophobic interactions only, this  
396 crucial  $\pi$ - $\pi$  stacking was missing. To delineate the importance of the interaction between  
397 these residues, we mutated alanine and glutamate the 13<sup>th</sup> and 14<sup>th</sup> positions into lysine  
398 and alanine, respectively, in the Pf-Ubc9 (Pf-Ubc9 KA mutant) and the 21<sup>st</sup> position  
399 residue into phenylalanine (A21F mutant), and a combination of these three mutations  
400 (KAF mutant). With these KAF mutations in the N-terminus, Pf-Ubc9 resembles Hs-  
401 Ubc9. The NMR titration experiments for <sup>15</sup>N Hs-SUMO-1 with Pf-Ubc9 A21F mutant

402 identified the same three binding sites reported in earlier sections (Fig. 5 b,c,  
 403 Supplementary Fig. 9 e,f). Though the interaction strength was weaker compared to the  
 404 Pf-SUMO: Pf-Ubc9 interaction, CSPs were shown by many residues. Furthermore,  
 405 molecular docking identified a stabilized interface between Hs-SUMO1 and Pf-Ubc9  
 406 KAF mutant (Fig. 5 d and Supplementary Fig. 9 c,d).

407

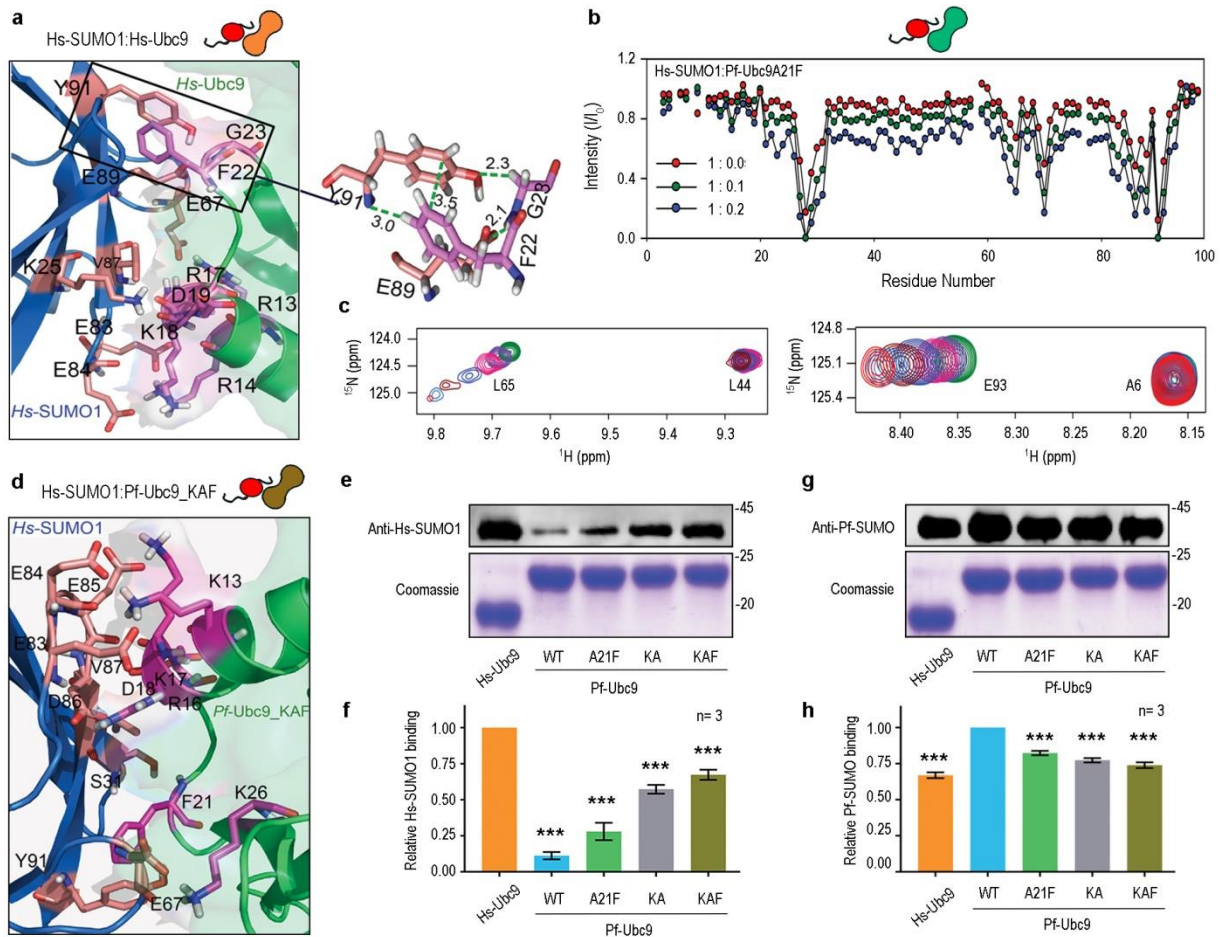

408

409

410 **Fig.5: N-terminal hydrophobic residues of Pf-Ubc9 are critical regulators of cross-**  
 411 **species interactions**

412 **a)** Docked model of Hs-SUMO1 residues showing interaction with the residues of Hs-  
 413 Hs-Ubc9. The colour coding for Hs-SUMO1 and Hs-Ubc9 are blue and green, respectively.  
 414 The boxed region is further zoomed in to show the  $\pi$ - $\pi$  and H-bonding interaction  
 415 between Y91 of Hs-SUMO1 and F22 of Hs-Ubc9 enzyme. **b)** Overlay and intensity  
 416 profile ( $I/I_0$ ) of amide cross-peaks obtained from  $^{15}\text{N}$ - $^1\text{H}$  HSQC spectra of Hs-SUMO1 in  
 417 the presence of different equivalents of A21F Pf-Ubc9, respectively. **c)** Excerpts of  
 418 selected peaks from Pf-Ubc9A21F interaction with Hs-SUMO1 as observed in (b). **d)**



419 Docked model of Hs-SUMO1 residues showing interaction with the residues of Pf-Ubc9  
420 KAF triple mutant. The colour coding for Hs-SUMO1 and mutant Pf-Ubc9 are  
421 respectively blue and green. **e)** *In vitro* binding assay of Hs-SUMO1 over Pf-Ubc9  
422 mutants. Upper panels indicate anti-Hs-SUMO1 antibody blotting, and the coomassie  
423 stained lower panels indicate Pf-Ubc9 protein levels. Hs-Ubc9 is used as a positive  
424 control in the reaction. **f)** The quantification of Hs-SUMO1 binding as seen in (e). **g)**  
425 Same as in (e); however, the Pf-SUMO binding is performed over the Pf-Ubc9 mutants.  
426 Upper panels indicate anti-Pf-SUMO antibody blotting, and the coomassie stained lower  
427 panels indicate Ubc9 levels. **h)** The quantification of Hs-SUMO1 binding as seen in (g).  
428 All experiments are performed at least three times independently. All statistical analysis  
429 was carried out using GraphPad Prism 8.4.3. Column analysis of data sets carried out  
430 by One-way ANOVA (nonparametric). Dunnett's test was used for multiple  
431 comparisons. Family-wise significance and confidence level is  $p < 0.001$ . Simple  
432 cartoons above relevant panels represent Hs-SUMO1 (red) and Pf-Ubc9 mutants.

433

434 In parallel, pulldown experiments with these Pf-Ubc9 mutants yielded a significant  
435 increase in their interaction with Hs-SUMO1. Compared to the poor interaction observed  
436 between Hs-SUMO1: Pf-Ubc9 (~10% of Hs-SUMO1: Hs-Ubc9 interaction strength), the  
437 A21F mutation improved interaction by ~2.5-fold to register ~28% interaction strength,  
438 and the KA and KAF mutants improved interaction strength significantly to ~57% and  
439 ~67%, respectively (Fig. 5 e,f). Thus, the two mutations in the N-terminus of Pf-Ubc9  
440 acted synergistically to facilitate interaction with Hs-SUMO1. More importantly, these  
441 mutants resembling Hs-Ubc9 showed an expected but mild reduction of ~20-25% in  
442 their Pf-SUMO interaction strengths, comparing well with Pf-SUMO: Hs-Ubc9 interaction  
443 (Fig. 5 g,h).

444

#### 445 **Pf-SUMO functionally engages the cellular human SUMOylation machinery**

446 We asked if Pf-SUMO can utilize cellular SUMOylation machinery and modify host  
447 proteins inside cells. First, we checked the localization of Pf-SUMO by transfecting  
448 Venus-tagged Pf-SUMO into HeLa cells. Venus-tagged Hs-SUMO1 and vector alone  
449 served as the positive and the negative controls, Pf-SUMO and Hs-SUMO1 expression  
450 levels were comparable, and they presented an overlapping intracellular localization  
451 pattern with a significant signal inside the nucleus (Fig. 6 a). Second, to assess  
452 SUMOylation efficiencies, we enriched Venus-tagged SUMO from HEK293T cell lysates  
453 coexpressing Hs-Ubc9. We estimated Hs-SUMO1 modified proteins intensity (bands  
454 appearing above 50 kDa) to be 100% modification under these experimental conditions  
455 and found that Pf-SUMO-mediated modification was ~30% (Fig. 6 b,c).

456 Next, we analyzed SUMO modified proteins enriched from Hs-SUMO or Pf-SUMO  
 457 overexpressing HEK293T cells using mass spectroscopy. We identified several proteins  
 458 pulled down from Hs-SUMO1 and Pf-SUMO transfected cells and assessed ~60  
 459 proteins to be significant. We expected so and found that a significantly large number of  
 460 these modified proteins were common between Hs-SUMO1 and Pf-SUMO. These  
 461 SUMO-modified proteins are components of established cellular machinery and  
 462 pathways like transcription regulation, stress response, protein chaperone, cytoskeletal  
 463 components and regulators, and cellular signaling mediators(Supplementary Table 3).  
 464 The MS analysis of Pf-SUMO modified host cell protein established the notion that Pf-  
 465 SUMO can utilize host SUMOylation machinery, and the same can play an essential  
 466 role in the sustenance of *Plasmodium* infection.

467

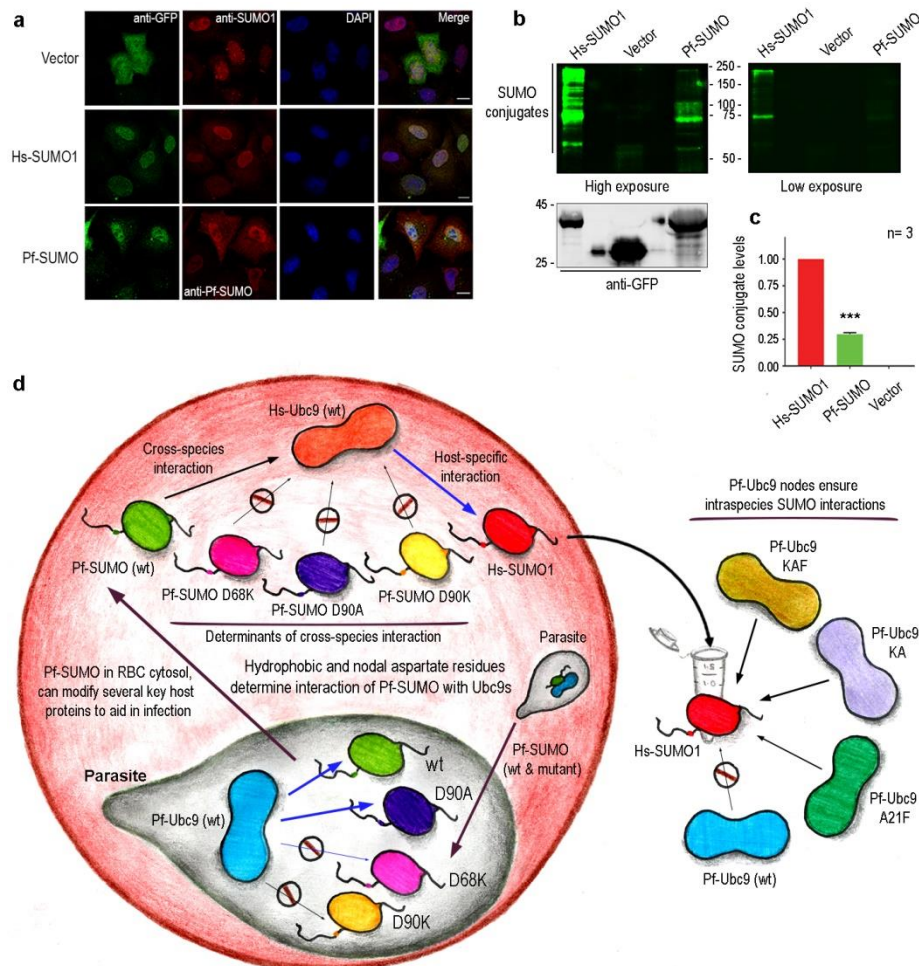

468

469

470 **Fig.6: Pf-SUMO can utilize human SUMO machinery *in cellulo* to modify host**  
 471 **proteins**

472 **a)** Localization of Venus tagged Hs-SUMO1 and Pf-SUMO in Hela cells. Cells stained  
473 with anti-GFP antibodies (first vertical panels, green) and anti-Hs-SUMO1 or anti-Pf-  
474 SUMO specific antibodies (second vertical panels, red) under respective transfection  
475 conditions. Chromatin is visualized by DAPI staining (third vertical panels, blue). The  
476 scale bar represents 10 $\mu$ m in each case. **b)** GFP binding protein (GBP) mediated  
477 pulldown from HEK293T cell lysates expressing vector control, or Venus tagged Hs-  
478 SUMO1 or Pf-SUMO. The extent of SUMO conjugation in each case is assessed by  
479 western blotting with anti-GFP antibodies (left and right upper panels). Lower left panels  
480 indicate input expression levels of expressed proteins. **c)** The quantification of the  
481 relative *in cellulo* SUMO conjugation as seen in b. **d)** A working model for Pf-SUMO  
482 cross-reactivity with human Ubc9 enzyme. The model also elaborates the anticipated  
483 effects of nodal mutation in Pf-SUMO on its ability to interact with the human Ubc9  
484 enzyme. It also suggests a possible role for Pf-SUMO in host RBC cytosol to modulate  
485 host responses by conjugating several host proteins. All experiments are performed at  
486 least three times independently. All statistical analysis was carried out using GraphPad  
487 Prism 8.4.3. Column analysis of data sets carried out by One-way ANOVA  
488 (nonparametric). Dunnett's test was used for multiple comparisons. Family-wise  
489 significance and confidence level is  $p < 0.001$ .

490

491 The model in Fig. 6 d summarizes and suggests that Pf-SUMO can interact with human  
492 SUMOylation machinery, and the C-terminal aspartates at 68<sup>th</sup> and 90<sup>th</sup> positions serve  
493 as critical nodes for discriminating Ubc9 enzymes leading to functional and opportunistic  
494 interaction. Moreover, Pf-Ubc9 has acquired critical changes in the N-terminal region  
495 allow only the proteins of the cognate SUMO pathway to interact. Thus, these residues  
496 serve as critical nodes in ensuring unidirectionality of cross-talk between Plasmodium  
497 and human SUMO pathway interactions. Selectively disrupting the interaction interface  
498 at the critical modes will offer an effective strategy against *Plasmodium* infection.

499

## 500 Discussion

501 Covalent protein modification during PTMs is often governed by non-covalent  
502 (electrostatic,  $\pi$ - $\pi$  hydrophobic) protein-protein interactions. SUMOylation is known to  
503 modulate protein-protein interactions, localization, and activity of the target proteins  
504 inside cells. Several pathogens target hosts SUMOylation pathway E1 and E2 enzymes  
505 to bolster infection and pathogenesis<sup>22,23,31,32</sup>. Interestingly, the SUMOylation pathway  
506 specificity in many eukaryotes and *Plasmodium* lies at the E1-E2 enzyme interaction  
507 level. Sequential and simultaneous interactions exist among the E1, E2 enzymes, and  
508 the SUMO paralogs<sup>13,14,16,33-35</sup>. Significant sequence similarities between *Plasmodium*

509 and human SUMOs and Ubc9s, and a positive Pf-SUMO:Hs-Ubc9 interaction,  
510 undetectable Hs-SUMO1:Pf-Ubc9 interaction (Figure S1 and Figure 1) are important  
511 observations. Striking structural similarity between Pf-SUMO and Hs-SUMOs, and  
512 SUMO:Ubc9 interaction interface further supports the idea of molecular piracy by  
513 Plasmodium and argues favourably for a physiologically relevant presence of Pf-  
514 SUMO's in the RBC cytosol<sup>9</sup>.

515 Charge-based non-covalent interactions between SUMO C-terminus and Ubc9 N-  
516 terminus are critical for SUMO modification<sup>18,19,33,34</sup>. Studies highlight the importance of  
517 negatively charged residues in SUMO/Smt3 C-terminus<sup>30</sup>. Mutation of D68 residue in  
518 Pf-SUMO to alanine or lysine abolished interaction with Pf-Ubc9 and Hs-Ubc9 and a  
519 cascading effect in its ability to participate in SUMOylation (Fig. 4). We propose that the  
520 D68 of Pf-SUMO is equivalent to E67 in Hs-SUMO1. E67 is an integral part of the E67  
521 interacting loop (EIL), exhibits precise non-covalent interactions<sup>36,37</sup>. Further, D68 of Pf-  
522 SUMO can play defining role in RBC cytosol to help in malaria pathogenesis. The D68  
523 residue perhaps can be part of a canonical protein export element (PEXEL) motif<sup>38-42</sup>,  
524 aiding in the possible translocation of Pf-SUMO into the RBC cytosol to exert effects on  
525 cross-species interaction with Hs-Ubc9.

526 Contrasting observations made with the Pf-SUMO 90<sup>th</sup> position aspartate mutants,  
527 where Pf-SUMO D90A: Hs-Ubc9 interaction decreases, with negligible impact on Pf-  
528 SUMO D90A: Pf-Ubc9 interaction (Fig. 4) suggested a discriminating role for the D90  
529 residue in Ubc9 specificity selection. Careful analysis of the Pf-SUMO D90A: Pf-Ubc9  
530 interaction indicated that the charge neutralization should induce loss of a salt bridge  
531 formation, but phenylalanine (F23) of Ubc9 and alanine (A90) of Pf-SUMO D90A mutant  
532 helps in restoring interaction through a new compensatory hydrophobic interaction (Fig.  
533 5). These results also help explain the reason for the lack of cross-species interaction  
534 between Hs-SUMO1: Pf-Ubc9 (Fig. 1). Further studies analyzing the anchor points will  
535 help assert a regulation on cross-species interaction between Pf-SUMO and Hs-Ubc9.

536 The N-terminal region of Ubc9 determines the species-specificity by engaging in  
537 specific interactions individually with E1 and SUMO. Accordingly, complete substitutions  
538 of Pf-Ubc9 N-terminus (aa 1-81) with residues of Hs-Ubc9 allowed functional interaction  
539 with the human-E1 enzyme<sup>10,11</sup>. Similarly, we report Alanine 13, Glutamate 14, and  
540 Alanine 21 in the N-terminus of Pf-Ubc9 as specific nodes determining cross-species  
541 interaction with Hs-SUMO1 (Fig. 5). Thus, these alterations in the N-terminus of Pf-  
542 Ubc9 appear an exciting strategy in engaging species-specific and cross-species  
543 interactions.

544 Our analysis centered around D68 and D90 of Pf-SUMO align well with synthetic  
545 lethality and growth defect phenotypes of equivalent charge-reversal mutations in the  
546 yeast Smt3<sup>30</sup>. Thus, we propose that D68 and D90 of Pf-SUMO as critical nodes in



547 establishing the cross-species and species-specific interaction with Ubc9s. Further, it  
548 can be extrapolated that D90 residue is more critical for engaging in species-specific  
549 Ubc9 recognition, differentiating Pf-Ubc9 and Hs-Ubc9 enzymes. Likewise, the N-  
550 terminal region of Pf-Ubc9 is a critical determinant of species-specific interaction with  
551 Hs-SUMO and may provide a handle to the parasite to exploit the host machinery (Fig.  
552 6 d).

553 In a host-pathogen interaction scenario, exploiting the host's pathways with the most  
554 negligible impact on its pathways represents an expedient strategy of a successful  
555 pathogen. Pf-SUMO's presence in Maurer's Cleft may be a similar strategy, suggesting  
556 Pf-SUMO can utilize the host SUMOylation machinery and modify essential host  
557 proteins. We propose that *Plasmodium*, through Pf-SUMO, can modulate the host  
558 processes and can exploit the human SUMOylation pathway during intraerythrocytic  
559 development stages. Besides, Hs-SUMO1 and Pf-Ubc9 interactions do not make sense  
560 in evolutionary terms. Several pathogens target the Ubc9 enzyme of the host and affect  
561 the SUMOylation process. We demonstrate that Pf-SUMO achieves the same while  
562 staging molecular piracy of the human SUMOylation pathway for successful infection.  
563 Importantly, targeting of SUMOylation pathway to regulate *Plasmodium* infection<sup>43</sup> can  
564 be an efficient strategy. Interestingly, small molecule inhibitors generated against  
565 *Plasmodium* SENP1 hold strong potential for malaria therapy. In the future, the  
566 SUMOylation pathway and the differentiating interface between SUMO and Ubc9 in  
567 host and pathogen can be exploited to target selective interface inhibitors as a possible  
568 remedy against malaria pathogenesis.

569

## 570 **Methods**

571

### 572 **cDNA Cloning and Plasmid Construction**

573 The mature form of Pf-SUMO (Pf-SUMO-GG) and Pf-Ubc9 enzyme coding regions  
574 were PCR-amplified from λZAP Plasmodium genomic DNA library provided by Prof.  
575 Shobhona Sharma (TIFR Mumbai, India) and subsequently cloned into pGEX-6P-1. The  
576 pGEX-6P-1 constructs thus generated have a GST-tag at the N-terminal end followed  
577 by the PreScission protease recognition site. Further, the pGEX-6P-1 clones of Pf-  
578 SUMO and Pf-Ubc9 were received from Prof. Michael Matunis (Johns Hopkins Univ.  
579 Baltimore, USA). Hs-SUMO1 and Hs-E2 were also sub-cloned into a pGEX-6P-1 vector.  
580 The wildtype and Pf-SUMO mutants described earlier were PCR amplified and  
581 subcloned into mammalian expression vector pVenus-C1. Human and Plasmodium  
582 Ubc9 were subcloned into the pET-28a (+) vector for expression and purification of

583 (His)<sub>6</sub>-tagged recombinant proteins. The *Pf*-SUMO wild type clone (pSUMO1-1S) for *in*  
584 *bacto* SUMOylation was derivatized from pSUMO1, was a gift from Primo Schaefer  
585 (Department of Biomedicine, University of Basel; Addgene plasmid #52258). All *Pf*-  
586 SUMO and *Pf*-Ubc9 mutants were generated using Q5 Site-Directed Mutagenesis kit  
587 (NEB #E0554S) in *Pf*-SUMO wild type backbone. The chimera of *Pf*-SUMO and human  
588 SUMO-1 were generated by utilizing the internal EcoRI site in the cDNA of *Hs*-SUMO1.  
589 For PfN chimera, the N-terminal coding region of *Pf*-SUMO (aa 1-60) was PCR  
590 amplified with BamHI and EcoRI ends and ligated pGEX-6P-1-*Hs*-SUMO1 clone  
591 digested to generate the compatible ends. To generate PfC chimera, the C-terminal  
592 coding region of *Pf*-SUMO (aa 61-98) was PCR amplified with EcoRI and XhoI ends  
593 and was ligated into pGEX-6P-1-*Hs*-SUMO1 clone digested to generate the compatible  
594 ends. The veracity of all the constructs used in the study was established by DNA  
595 sequencing.

596

## 597 **Recombinant Protein Expression and Purification**

598 Unlabeled and isotope-labeled proteins were all expressed in *E.coli* BL21 ( $\lambda$ DE3) cells.  
599 All proteins such as *Hs*-SUMO1, *Hs*-E2, *Pf*-E2, and *Pf*-SUMO (WT and its mutants)  
600 were expressed and purified as previously described<sup>44</sup>. Briefly, cell pellets were  
601 resuspended in lysis buffer (20 mM Tris-HCl pH 8.0, 1 mM EDTA, 100 mM NaCl)  
602 containing 0.01% Triton X-100, 1 mM PMSF (phenyl methane sulfonyl fluoride)  
603 protease inhibitor and 1 mg/mL of lysozyme. Resuspended cell pellets were sonicated  
604 (30% amp, pulse on 3 sec, pulse off 5 sec) for 20 min in ice and centrifuged at 17,000  
605 rpm for 45 min at 4 °C to pellet down the cell debris. The supernatants were incubated  
606 for 2 h at 4 °C with Glutathione-Agarose beads to bind GST-tag proteins to the beads.  
607 Beads were washed with lysis buffer containing increasing NaCl concentration (200,  
608 400, and 600 mM) to remove non-specifically binding proteins. *Pf*-SUMO (WT) and its  
609 mutants and *Pf*-E2 proteins were digested with PreScission protease on-column  
610 cleavage at 4 °C. However, *Hs*-SUMO1 and *Hs*-E2 proteins were digested with  
611 thrombin (3-5 units/mg of proteins) at 22 °C to remove the GST tag from the GST-tag  
612 proteins. All eluted proteins were further purified on a Superdex<sup>TM</sup> 75 10/300 GL column  
613 (GE Healthcare). The purified proteins were analyzed by SDS-PAGE and MALDI-TOF  
614 and concentrated using ultra-filtration through a 3 kDa cut-off Amicon (Millipore)  
615 membrane. The concentration of proteins was estimated using UV-absorption at 280  
616 nm. For NMR experiments, singly labeled (<sup>15</sup>N) and doubly labeled (<sup>13</sup>C and <sup>15</sup>N) protein  
617 samples were prepared using <sup>15</sup>NH<sub>4</sub>Cl and uniformly <sup>13</sup>C labeled glucose as the sole  
618 sources of nitrogen and carbon. For isothermal titration calorimetry (ITC) and SPR  
619 analysis, eluted proteins were dialyzed into a buffer containing 20 mM Tris-HCl, pH 7.8,  
620 50 mM NaCl.

621 For *in vitro* pulldown assays and SUMOylation experiments, proteins were expressed in  
622 *E.coli* BL21 ( $\lambda$ DE3) cells and induced with 200  $\mu$ M isopropyl  $\beta$ -D-1-  
623 thiogalactopyranoside (IPTG) for 4 h at 30 °C. For GST tagged protein purification, cell  
624 pellets were resuspended with lysis buffer (20 mM Tris-HCl pH 7.5, 1 mM EDTA, 150  
625 mM NaCl) containing 0.1% Triton X-100, 5 mM  $\beta$  mercaptoethanol ( $\beta$ -ME), 1 mM PMSF  
626 (phenyl methane sulfonyl fluoride, MP Biomed #195381) protease inhibitor and 1 mg/mL  
627 of lysozyme. Resuspended cell pellets were sonicated (45% amp, pulse on 10 sec,  
628 pulse off 20 sec) for 3 min on ice and centrifuged at 20,000 rpm for 30 min at 4 °C to  
629 pellet down the cell debris. The supernatants were incubated for 1 hr at 4 °C with  
630 Glutathione-Agarose beads to bind GST-tag proteins to the beads. (Merck #70541).  
631 Beads were washed with lysis buffer containing 400 mM of NaCl to remove the non-  
632 specific binding of other proteins. Proteins were eluted using 20 mM glutathione-  
633 containing lysis buffer (MP Biomed #101814). All eluted proteins were further dialyzed  
634 using a 12-14 kDa dialysis membrane (Spectra/Por #132706) to remove excess  
635 glutathione. For (His)<sub>6</sub>-tagged protein purification, cell pellets were resuspended with  
636 lysis buffer (50 mM NaH<sub>2</sub>PO<sub>4</sub> pH 8.0, 300 mM NaCl, 10 mM imidazole [MP Biomed  
637 #102033]) containing 0.1% Triton X-100, 5 mM  $\beta$  mercaptoethanol ( $\beta$ -ME), 1 mM PMSF  
638 protease inhibitor and 1 mg/mL of lysozyme. Resuspended cell pellets were sonicated  
639 (45% amp, pulse on 10 sec, pulse off 20 sec) for 3 min in ice and centrifuged at 20,000  
640 rpm for 30 min at 4 °C to pellet down the cell debris. The supernatants were incubated  
641 for 1 h at 4 °C with Ni-NTA agarose beads to bind (His)<sub>6</sub>-tag proteins to the beads.  
642 (Qiagen #1018244). Beads were washed with lysis buffer containing 25 mM of  
643 imidazole to remove the non-specific binding of other proteins. Proteins were eluted  
644 using the lysis buffer containing 250 mM imidazole (MP Biomed #101814). All eluted  
645 proteins were further dialyzed using 12-14 kDa dialysis membrane to remove the  
646 imidazole. Further, proteins were quantitated and stored at -80 °C as aliquots.

647

### 648 **Antibody generation**

649 Antibodies against Pf-SUMO were custom generated at Imgenex, India. Bacterially  
650 purified GST-Pf-SUMO were injected into rabbits, and polyclonal antibodies were affinity  
651 purified over GST-Pf-SUMO cross-linked beads. Purified antibodies were characterized  
652 for their efficacies in western blotting and immunofluorescence experiments. In addition,  
653 antibodies for Human-SUMO1 were generated as described elsewhere<sup>45</sup>.

654

### 655 **Structure calculations using NMR spectroscopy**

656 Isotopically labeled proteins for NMR experiments were prepared as published in  
657 protocol elsewhere<sup>44</sup>. For structure calculation, samples of <sup>15</sup>N and <sup>13</sup>C/<sup>15</sup>N-labelled *Pf*-

658 SUMO were prepared at a concentration of 1.0 mM in 20 mM Tris-HCl pH 7.0, 50  
659 mM NaCl, containing 90% H<sub>2</sub>O, 10% <sup>2</sup>H<sub>2</sub>O. All the NMR experiments were performed  
660 on Bruker (AVANCEIII HD) 750 MHz spectrometers equipped with a room temperature  
661 triple resonance probe equipped with Z-gradient. A series of two- and three-dimensional  
662 experiments like <sup>15</sup>N-edited (T<sub>mix</sub>-150 ms) and <sup>13</sup>C-edited NOESY-HSQC (T<sub>mix</sub>-150 ms)  
663 spectra were recorded to generate the structural restraints for Pf-SUMO protein at 298  
664 K. All spectra were processed using Bruker TOPSPIN 3.2, and NOE cross-peaks were  
665 assigned manually using CARA 1.8.4.2 software<sup>46</sup>. Intensity obtained from cross-peaks  
666 was used to generate distance restraints using the CYANA-3.0<sup>47</sup> program. Out of 1415  
667 distance restraints, the distribution of various NOE restraints was as follows: 245-  
668 sequential, 367- intra-residual, 342,- medium-range and 461- long-range. In addition, 40  
669 hydrogen bonds obtained for H-D exchange <sup>15</sup>N-HSQC experiments were also used as  
670 restraints. CYANA 3.0 software was used to generate 200 randomized conformers, out  
671 of which 10 conformers with the lowest target function, having no distance and angle  
672 violation, were selected. These 10 conformers were further refined using the CNS 1.21  
673 software based on molecular dynamics simulation and the standard water shell  
674 refinement protocol<sup>48,49</sup>. The distances between the atoms are relaxed during this stage,  
675 improving Ramachandran's plot statistics and Z-score for the (phi, psi) residues in the  
676 ordered region. The PSVSv1.4 software (<http://www.psvs-1.4.nesq.org>) was used to  
677 analyze the quality of the structure. PYMOL software (<http://pymol.sourceforge.net/>)  
678 was used for generating figures for structures.

679

## 680 **Isothermal Titration Calorimetry**

681 ITC experiments were performed for Pf-SUMO, D90A-Pf-SUMO, and Hs-SUMO1 with  
682 Pf-Ubc9 and Hs-Ubc9 using MicroCal iTC200 (GE Healthcare) in their respective buffer.  
683 Pf-SUMO and its mutant and Hs-SUMO1 (2 μL, 450-600 μM) were added with the  
684 syringe to the sample cell containing (30-50 μM) Pf-Ubc9 and Hs-Ubc9 at a constant  
685 stirring rate of 1000 rpm. A total of 19 injections was performed for each experiment  
686 with an interval of 120 sec. In each injection, the mixing duration between cell and  
687 syringe sample was 5.0 sec. To nullify the heat of dilution, Pf-SUMO and Hs-SUMO1  
688 were titrated against a buffer and subtracted from the raw data prior to model fitting. The  
689 temperature was maintained at 298K during the experiments. Titrations were performed  
690 in duplicate using the same set of stock solutions. The ITC data were analyzed using  
691 the ORIGIN version of the software provided by MicroCal iTC200.

692

## 693 **Surface Plasmon Resonance**



694 The binding kinetics of Pf-SUMO, D90A-Pf-SUMO, and Hs-SUMO1 with Pf-Ubc9 and  
695 Hs-Ubc9 were determined using surface plasmon resonance (BIAcore T200 GE  
696 Healthcare) at 298K. The Pf-SUMO, D90A-Pf-SUMO, and Hs-SUMO1 proteins were  
697 immobilized in 10 mM sodium acetate buffer (pH 4.5) on the CM5 sensor chip. The  
698 various concentrations (0.78-100  $\mu$ M) of Pf-Ubc9 and Hs-Ubc9 were passed over the  
699 immobilized proteins at a flow rate of 30  $\mu$ L/min. The 20 mM Tris-HCl, 50 mM NaCl (pH  
700 7.8) was used as a running buffer. The contact time and dissociation time were 120 and  
701 300 sec, respectively. For regeneration, 10 mM Glycine (pH 2.5) was used. The  
702 obtained sensorgram is fitted into a steady-state affinity equation using Biacore T200  
703 evaluation software.

704

### 705 **NMR titrations of Pf-SUMO and its mutant against Pf-Ubc9 and Hs-Ubc9**

706 To check the interactions of Pf-SUMO with Pf-Ubc9 and Hs-Ubc9, we recorded a series  
707 of HSQC spectra of the  $^{15}$ N labeled Pf-SUMO and its mutant in its free form and then  
708 titrated with a different equivalent of unlabelled Pf-Ubc9 and Hs-Ubc9 enzymes (0.05,  
709 0.1, 0.2, 0.4, 0.6 equivalents). Similar experiments were performed with  $^{15}$ N labeled Hs-  
710 SUMO-1 and different equivalents of unlabelled Pf-Ubc9 and Hs-Ubc9 enzymes.  
711 Perturbation in amide cross peak either due to decreased intensity or chemical shift  
712 perturbation (CSP) was monitored. CSP was calculated by using the formula  $\Delta\Delta\delta =$   
713  $[(5\Delta\delta^H)^2 + (\Delta\delta^{15N})^2]^{1/2}$  where  $\delta^H$  and  $\delta^{15N}$  represent the difference in proton and  
714 nitrogen chemical shifts respectively. Similarly, intensity change was quantified as the  
715 amide cross peaks intensities (I) with respect to the same cross-peaks intensities (I<sub>0</sub>) in  
716 the absence of E2 proteins.

717

### 718 **Docking study of Pf-SUMO and Hs-SUMO1 against Pf-Ubc9 and Hs-Ubc9 enzymes**

719 The crystal structure of Hs-SUMO1 with Hs-Ubc9 (PDB code: 2uyz) was taken as a  
720 template to build the docked model for Pf SUMO with Pf-Ubc9 and Hs-Ubc9 enzymes.  
721 We used the HADDOCK (High Ambiguity Driven, protein-protein Docking) server 2.2  
722 (<http://haddock.science.uu.nl/services/HADDOCK2.2>) for protein-protein docking<sup>50</sup>.  
723 HADDOCK uses NMR restraints as an input parameter to perform a guided docking.  
724 Here Pf-Ubc9 and Hs-Ubc9 were taken as a ligand, and the NMR structure of Pf-SUMO  
725 ((PDB code: 5gjl) was taken as a receptor. We provided the active and passive residues  
726 originated from the NMR titration study for docking. The detailed information about the  
727 interface area of docked models was analyzed by using the web-based server  
728 PDBePISA ([http://www.ebi.ac.uk/msd-srv/prot\\_int/pistart.html](http://www.ebi.ac.uk/msd-srv/prot_int/pistart.html)).

729

730 ***In vitro* SUMOylation reaction**

731 *In vitro* SUMOylation reactions contained E1 enzyme (0.25 µg GST-SAE2/SAE1), E2  
732 enzyme (1.0 µg (His)<sub>6</sub>-Ubc9), GST-tagged SUMO protein (4 µg of wildtype or mutant  
733 SUMO), and GST-tagged substrate peptide (4 µg) in the reaction buffer (50 mM Tris, pH  
734 7.5, 5 mM MgCl<sub>2</sub>, 5 mM ATP, 5 mM DTT). SUMOylation reactions were incubated at 37  
735 °C for indicated time points and terminated with 6X Laemmli buffer and boiled for 10  
736 min. SUMOylation reaction was analyzed by resolving reaction products on SDS-PAGE  
737 followed by Coomassie Brilliant Blue (R250) staining. Quantification of *in vitro*  
738 SUMOylation was carried out at an interval of 3 h.

739

740 ***In bacto* SUMOylation reaction**

741

742 A standard substrate peptide constructs in pGEX-6P-1 vector co-transformed with  
743 pSUMO1-1S (Pf-SUMO wildtype or its mutants) to *E.coli* BL21 (λDE3) cells. Double  
744 transformants were selected on Luria broth (LB) agar plates having 50 mg/L of  
745 ampicillin and 25 mg/L of streptomycin. For *in bacto* SUMOylation, mid-log phase  
746 cultures were induced with 200 µM isopropyl β-D-1-thiogalactopyranoside (IPTG) at 25  
747 °C for 18 h. Cells were harvested by centrifugation at 10,000xg, lysed in lysis buffer (20  
748 mM Tris, pH 7.5, 150 mM NaCl, 1 mM EDTA, 0.1% Triton X-100, 5 mM β-ME, 1 mM  
749 PMSF) and soluble protein fractions were extracted by sonication. Crude lysates were  
750 then cleared by centrifugation at 20,000 rpm at 4 °C for 30 min. Recombinant proteins  
751 were affinity purified on Glutathione-Agarose beads followed by washes with wash  
752 buffer containing 400 mM NaCl. For visualization of bead-bound purified proteins, beads  
753 were boiled in 1X Laemmli buffer, and the resultant sample was subsequently analyzed  
754 on SDS-PAGE followed by Coomassie Brilliant Blue (R250) staining.

755

756

757 ***In vitro* pulldown reaction**

758

759 For *in vitro* pulldown experiments, 13 µM (His)<sub>6</sub>-tagged Ubc9 were immobilized on the  
760 Ni-NTA beads, and 20 µM of purified wildtype or mutant SUMOs were mixed in binding  
761 buffer (20 mM Tris HCl pH 7.5, 150 mM NaCl). Tubes were incubated under constant  
762 rotation (300 rpm) at room temperature for 2 h. Subsequently, beads were washed  
763 three times carefully with wash buffer (20 mM Tris HCl pH 7.5, 150 mM NaCl) for 5 min  
764 each. Finally, bead-bound proteins were extracted by boiling for 10 min in 1X Laemmli  
765 buffer. Samples thus obtained were further analyzed on SDS-PAGE and western  
766 blotting.

767

## 768 **Western Blotting**

769 All samples for western blotting were resolved to the desired extent on SDS-PAGE.  
770 Following wet transfer protocols, proteins were transferred onto the methanol-activated  
771 0.2  $\mu\text{m}$  PVDF membrane (Merck #ISEQ85R) using 1X transfer buffer (2.5 mM Tris-HCl  
772 pH 7.5, 19.2 mM Glycine). The membrane was blocked for 1 h in 5% BSA. Further, the  
773 membrane was incubated overnight with primary antibodies (Rabbit-anti-Hs-SUMO1  
774 [1:5000], or Rabbit-anti-Pf-SUMO [1:5000]). The membrane was later washed three  
775 times for 10 min each with TBS-T buffer (20 mM Tris HCl pH 7.5, 150 mM NaCl, 0.1%  
776 Tween-20). The membrane was incubated with Alexa fluor Plus 680 secondary  
777 antibodies (Invitrogen #A32734) for 1 h. Later it was washed with TBS-T buffer (three  
778 times for 10 min each). Images were taken using LI-COR (Model: 9120) IR system.

779

## 780 **Cell culture and transfections**

781

782 HEK293T and HeLa cell lines were cultured in Dulbecco's Modified Eagle's Medium  
783 (DMEM) (Gibco #11995-065) supplemented with 10% (v/v) Fetal Bovine Serum (FBS)  
784 (Gibco #10270-106) and 1% antibiotics (Gibco #15240-062) in a humidified incubator at  
785 37°C under 5% CO<sub>2</sub> conditions.  $1 \times 10^7$  cells were grown in 100-mm cell culture plates  
786 for GFP-trap pull-downs or on coverslips in a six-well plate format ( $3 \times 10^5$  cells per well)  
787 for immunofluorescence. 12 hrs post-seeding, cells were transfected using  
788 polyethylenimine (PEI) 25-kDa linear polymer (Polysciences Corporation Ltd. #23966)  
789 or Effectene Transfection reagent (Qiagen #301425) following the manufacturer's  
790 instructions.

791

## 792 **Immunofluorescence**

793 HeLa cells were transfected with desired mammalian SUMO expression clones using  
794 Effectene Transfection reagent and allowed to grow for 12 hrs. Later, cells were again  
795 washed twice with PBS and fixed using 4% formaldehyde for 15 min at 4 °C. The cells  
796 were then rehydrated and permeabilized with rehydration buffer (10 mM Tris, 150 mM  
797 NaCl, 0.1% TritonX-100) for 10 min. Cells were blocked with 5% Normal Goat Serum  
798 (NGS) for 1 h at 4 °C after rehydration. The cells were stained overnight at 4 °C with  
799 rabbit-anti-Hs-SUMO1 (1:600), rabbit-anti-Pf-SUMO (1:600), and the anti-GFP antibody  
800 (1:800, sc-9996, Santa Cruz Biotechnology). After primary antibody incubation, cells  
801 were washed three times with PBS-T (5 min each) and incubated with 1:1000 dilutions  
802 of anti-mouse Alexa Flour 488 (Thermo #A11029) and anti-rabbit Alexa Fluor 568  
803 (Thermo #A11036) for 1 h. Cells were washed thrice with PBS-T and mounted on slides

804 using DAPI containing mounting medium (Sigma #F6057). Fluorescence signals were  
805 captured on Zeiss LSM 780 confocal microscope, and images were analyzed using  
806 Image J software.

807

### 808 **GFP-trap pulldown**

809

810 GFP binding protein (GBP) clone was a kind gift from Heinrich Leonhardt (Ludwig-  
811 Maximilians-University of Munich). GBP cDNA was subcloned into the pGEX-6P-1  
812 vector to express GST-tagged GBP. Venus tagged Hs-SUMO1 and Venus-tagged Pf-  
813 SUMO were coexpressed with 3X-FLAG-Ubc9 (100-mm dish format) in HEK293T cells.  
814 Cleared lysates prepared from cells expressing GFP-SUMO variants and were mixed  
815 with GST-GBP, and the complex formed was pulled down on glutathione-agarose  
816 beads. Bound material was eluted and processed in 1X Laemmli buffer for Western  
817 blotting and detected with anti-GFP antibody (1:6000, sc-9996, Santa Cruz  
818 Biotechnology).

819

### 820 **Mass spectrometry analysis of GFP-trap pulldown proteins**

821 Mammalian proteins enriched by GFP-trap pulldown were subjected to mass  
822 spectrometry analysis. SCIEX X500B qToF platform paired with ExionLC AD UHPLC  
823 and XB-C18 column was used for the LC-ESI-MS data of trypsin digested proteins. The  
824 mass spectrometry data obtained were searched against the *Homo sapiens* database  
825 consisting of 20,395 proteins acquired from Uniprot using Proteome Discoverer 2.2  
826 software. The processing workflow comprised of spectrum selector and SEQUEST  
827 incorporated as search engines. The search was carried out with trypsin, and double  
828 missed cleavage was allowed with a minimum peptide length of 6 amino acids. For MS1  
829 peaks, the mass deviation was considered as 10 ppm and 0.05 Da for peptide  
830 tolerance. Carbamidomethylation of cysteine was included as static, and oxidation of  
831 methionine and acetylation were as dynamic modification. A false discovery rate (FDR)  
832 of 1% was considered for the result.

833

### 834 **Statistical analysis**

835 Image analysis, processing, and band quantitation were done using ImageJ software or  
836 GelQuant.NET. The experiments were independently repeated at least three times, and  
837 the values are expressed as mean  $\pm$  SD. Column analysis of data sets was carried out



838 by One-way ANOVA (nonparametric) and Dunnett's test for multiple comparisons.  
839 Family-wise significance and confidence level is  $p < 0.001$ . Graphs were plotted using  
840 GraphPad Prism 8.4.3.

#### 841 **Competing interests**

842 The authors declare no competing interests.

843

#### 844 **References**

- 845 1. Russell, R. B. *et al.* A structural perspective on protein-protein interactions. *Curr.*  
846 *Opin. Struct. Biol.* **14**, 313–324 (2004).
- 847 2. Perkins, J. R., Diboun, I., Dessailly, B. H., Lees, J. G. & Orengo, C. Transient  
848 Protein-Protein Interactions: Structural, Functional, and Network Properties.  
849 *Structure* **18**, 1233–1243 (2010).
- 850 3. Wang, Y. C., Peterson, S. E. & Loring, J. F. Protein post-translational  
851 modifications and regulation of pluripotency in human stem cells. *Cell Res.* **24**,  
852 143–160 (2014).
- 853 4. Deribe, Y. L., Pawson, T. & Dikic, I. Post-translational modifications in signal  
854 integration. *Nat. Struct. Mol. Biol.* **17**, 666–672 (2010).
- 855 5. Hisaeda, H., Yasutomo, K. & Himeno, K. Malaria: Immune evasion by parasites.  
856 *Int. J. Biochem. Cell Biol.* **37**, 700–706 (2005).
- 857 6. Belachew, E. B. Immune Response and Evasion Mechanisms of Plasmodium  
858 falciparum Parasites. *J. Immunol. Res.* **2018**, (2018).
- 859 7. Gomes, P. S., Bhardwaj, J., Rivera-Correa, J., Freire-De-Lima, C. G. & Morrot, A.  
860 Immune escape strategies of malaria parasites. *Front. Microbiol.* **7**, (2016).
- 861 8. Jongwutiwes, S., Tanabe, K., Hughes, M. K., Kanbara, H. & Hughes, A. L. Allelic  
862 variation in the circumsporozoite protein of Plasmodium falciparum from Thai field  
863 isolates. *Am. J. Trop. Med. Hyg.* **51**, 659–668 (1994).
- 864 9. Issar, N., Roux, E., Mattei, D. & Scherf, A. Identification of a novel post-  
865 translational modification in Plasmodium falciparum: Protein sumoylation in  
866 different cellular compartments. *Cell. Microbiol.* **10**, 1999–2011 (2008).
- 867 10. Reiter, K. *et al.* Identification of biochemically distinct properties of the small  
868 ubiquitin-related modifier (SUMO) conjugation pathway in Plasmodium falciparum.  
869 *J. Biol. Chem.* **288**, 27724–27736 (2013).
- 870 11. Reiter, K. H. *et al.* Characterization and structural insights into selective E1-E2  
871 interactions in the human and plasmodium falciparum sumo conjugation systems.

- 872 *J. Biol. Chem.* **291**, 3860–3870 (2016).
- 873 12. Ponts, N. *et al.* Unraveling the ubiquitome of the human malaria parasite. *J. Biol.*  
874 *Chem.* **286**, 40320–40330 (2011).
- 875 13. Geiss-Friedlander, R. & Melchior, F. Concepts in sumoylation: A decade on. *Nat.*  
876 *Rev. Mol. Cell Biol.* **8**, 947–956 (2007).
- 877 14. Wang, Y. & Dasso, M. SUMOylation and deSUMOylation at a glance. *J. Cell Sci.*  
878 **122**, 4249–4252 (2009).
- 879 15. Wilkinson, K. A. & Henley, J. M. Mechanisms, regulation and consequences of  
880 protein SUMOylation. *Biochem. J.* **428**, 133–145 (2010).
- 881 16. Pichler, A., Fatouros, C., Lee, H. & Eisenhardt, N. SUMO conjugation - A  
882 mechanistic view. *Biomol. Concepts* **8**, 13–36 (2017).
- 883 17. K., S. T. *et al.* SUMO and SUMOylation Pathway at the Forefront of Host Immune  
884 Response . *Frontiers in Cell and Developmental Biology* vol. 9 1762 (2021).
- 885 18. Knipscheer, P., Van Dijk, W. J., Olsen, J. V., Mann, M. & Sixma, T. K.  
886 Noncovalent interaction between Ubc9 and SUMO promotes SUMO chain  
887 formation. *EMBO J.* **26**, 2797–2807 (2007).
- 888 19. Capili, A. D. & Lima, C. D. Structure and Analysis of a Complex between SUMO  
889 and Ubc9 Illustrates Features of a Conserved E2-Ubl Interaction. *J. Mol. Biol.*  
890 **369**, 608–618 (2007).
- 891 20. Matos, B., Howl, J., Jerónimo, C. & Fardilha, M. The disruption of protein-protein  
892 interactions as a therapeutic strategy for prostate cancer. *Pharmacol. Res.* **161**,  
893 (2020).
- 894 21. Li, H. *et al.* Validation of the proteasome as a therapeutic target in plasmodium  
895 using an epoxyketone inhibitor with parasite-specific toxicity. *Chem. Biol.* **19**,  
896 1535–1545 (2012).
- 897 22. Ribet, D. *et al.* *Listeria monocytogenes* impairs SUMOylation for efficient infection.  
898 *Nature* **464**, 1192–1195 (2010).
- 899 23. Sidik, S. M., Salsman, J., Dellaire, G. & Rohde, J. R. *Shigella* infection interferes  
900 with SUMOylation and increases PML-NB number. *PLoS One* **10**, 1–14 (2015).
- 901 24. Reiter, K. H. & Matunis, M. J. Detection of SUMOylation in *Plasmodium*  
902 *falciparum*. in *SUMO: Methods and Protocols* (ed. Rodriguez, M. S.) 283–290  
903 (Springer New York, 2016). doi:10.1007/978-1-4939-6358-4\_19.
- 904 25. Ponder, E. L. *et al.* Functional characterization of a SUMO deconjugating  
905 protease of *Plasmodium falciparum* using newly identified small molecule  
906 inhibitors. *Chem. Biol.* **18**, 711–721 (2011).
- 907 26. Williamson, M. P. Using chemical shift perturbation to characterise ligand binding.

- 908            *Prog. Nucl. Magn. Reson. Spectrosc.* **73**, 1–16 (2013).
- 909    27.    Ziarek, J. J., Peterson, F. C., Lytle, B. L. & Volkman, B. F. *Binding Site*  
910            *Identification and Structure Determination of ProteinLigand Complexes by NMR:*  
911            *A Semiautomated Approach. Methods in Enzymology* vol. 493 (Elsevier Inc.,  
912            2011).
- 913    28.    Vaynberg, J. & Qin, J. Weak protein-protein interactions as probed by NMR  
914            spectroscopy. *Trends Biotechnol.* **24**, 22–27 (2006).
- 915    29.    Duda, D. M. *et al.* Structure of a SUMO-binding-motif Mimic Bound to Smt3p-  
916            Ubc9p: Conservation of a Non-covalent Ubiquitin-like Protein-E2 Complex as a  
917            Platform for Selective Interactions within a SUMO Pathway. *J. Mol. Biol.* **369**,  
918            619–630 (2007).
- 919    30.    Newman, H. A. *et al.* A high throughput mutagenic analysis of yeast sumo  
920            structure and function. *PLoS Genet.* **13**, 1–30 (2017).
- 921    31.    Boggio, R., Colombo, R., Hay, R. T., Draetta, G. F. & Chiocca, S. A mechanism  
922            for inhibiting the SUMO pathway. *Mol. Cell* **16**, 549–561 (2004).
- 923    32.    Verma, S. *et al.* Salmonella Engages Host MicroRNAs To Modulate SUMOylation:  
924            a New Arsenal for Intracellular Survival. *Mol. Cell. Biol.* **35**, 2932–2946 (2015).
- 925    33.    Hecker, C. M., Rabiller, M., Haglund, K., Bayer, P. & Dikic, I. Specification of  
926            SUMO1- and SUMO2-interacting motifs. *J. Biol. Chem.* **281**, 16117–16127  
927            (2006).
- 928    34.    Kerscher, O. SUMO junction—what’s your function? New insights through SUMO-  
929            interacting motifs. *EMBO Rep.* **8**, 550–555 (2007).
- 930    35.    Gareau, J. R. & Lima, C. D. The SUMO pathway: Emerging mechanisms that  
931            shape specificity, conjugation and recognition. *Nat. Rev. Mol. Cell Biol.* **11**, 861–  
932            871 (2010).
- 933    36.    Pilla, E. *et al.* A novel SUMO1-specific interacting motif in dipeptidyl peptidase 9  
934            (DPP9) that is important for enzymatic regulation. *J. Biol. Chem.* **287**, 44320–  
935            44329 (2012).
- 936    37.    Brantis-de-Carvalho, C. E. *et al.* MxA interacts with and is modified by the  
937            SUMOylation machinery. *Exp. Cell Res.* **330**, 151–163 (2015).
- 938    38.    Hiller, N. L. *et al.* A Host-Targeting Signal in Virulence Proteins Reveals a  
939            Secretome in Malarial Infection. *Science (80)*. **306**, 1934–1937 (2004).
- 940    39.    Marti, M., Good, R. T., Rug, M., Knuepfer, E. & Cowman, A. F. Targeting Malaria  
941            Virulence and Remodeling Proteins to the Host Erythrocyte. *Science (80)*. **306**,  
942            1930–1933 (2004).
- 943    40.    Boddey, J. A., Moritz, R. L., Simpson, R. J. & Cowman, A. F. Role of the

- 944 Plasmodium export element in trafficking parasite proteins to the infected  
945 erythrocyte. *Traffic* **10**, 285–299 (2009).
- 946 41. Boddey, J. A. *et al.* An aspartyl protease directs malaria effector proteins to the  
947 host cell. *Nature* **463**, 627–631 (2010).
- 948 42. Hodder, A. N. *et al.* Structural basis for plasmepsin v inhibition that blocks export  
949 of malaria proteins to human erythrocytes. *Nat. Struct. Mol. Biol.* **22**, 590–596  
950 (2015).
- 951 43. Kronenberger, T. & Palmisano, G. Targeting SUMOylation in Plasmodium as a  
952 Potential Target for Malaria Therapy. *Front. Cell. Infect. Microbiol.* **11**, 1–7 (2021).
- 953 44. Singh, J. S., Shukla, V. K., Gujrati, M., Mishra, R. K. & Kumar, A. Backbone and  
954 side-chain resonance assignments of Plasmodium falciparum SUMO. *Biomol.*  
955 *NMR Assign.* **11**, 17–20 (2017).
- 956 45. Gujrati, M., Mittal, R., Ekal, L. & Mishra, R. K. SUMOylation of periplakin is critical  
957 for efficient reorganization of keratin filament network. *Mol. Biol. Cell* **30**, 357–369  
958 (2019).
- 959 46. Keller, R. *The computer aided resonance assignment tutorial. Goldau,*  
960 *Switzerland: Cantina Verlag* (2004).
- 961 47. Güntert, P., Mumenthaler, C. & Wüthrich, K. Torsion angle dynamics for NMR  
962 structure calculation with the new program DYANA. *J. Mol. Biol.* **273**, 283–298  
963 (1997).
- 964 48. Shen, Y., Delaglio, F., Cornilescu, G. & Bax, A. TALOS+: A hybrid method for  
965 predicting protein backbone torsion angles from NMR chemical shifts. *J. Biomol.*  
966 *NMR* **44**, 213–223 (2009).
- 967 49. Brünger, A. T. *et al.* Crystallography & NMR system: A new software suite for  
968 macromolecular structure determination. *Acta Crystallogr. Sect. D Biol.*  
969 *Crystallogr.* **54**, 905–921 (1998).
- 970 50. Van Zundert, G. C. P. *et al.* The HADDOCK2.2 Web Server: User-Friendly  
971 Integrative Modeling of Biomolecular Complexes. *J. Mol. Biol.* **428**, 720–725  
972 (2016).

973

974

975

976

977



978

## Supplementary Figures and tables

979

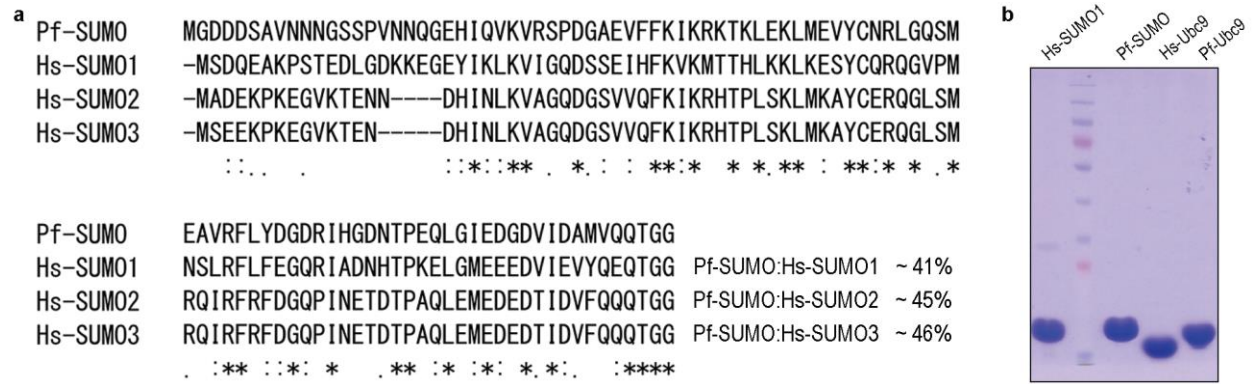

980

981

### 982 **Supplementary Fig. 1: Protein purification and sequence alignment.**

983 **a)** Primary sequence alignment of Plasmodium SUMO against human SUMO1,  
 984 SUMO2, and SUMO3. Percentage sequence identity of Plasmodium SUMO with each  
 985 human SUMO paralog is mentioned. **b)** SDS-PAGE image showing untagged and  
 986 purified Hs-SUMO1, Pf-SUMO, Hs-Ubc9, and Pf-Ubc9 proteins.

987

988

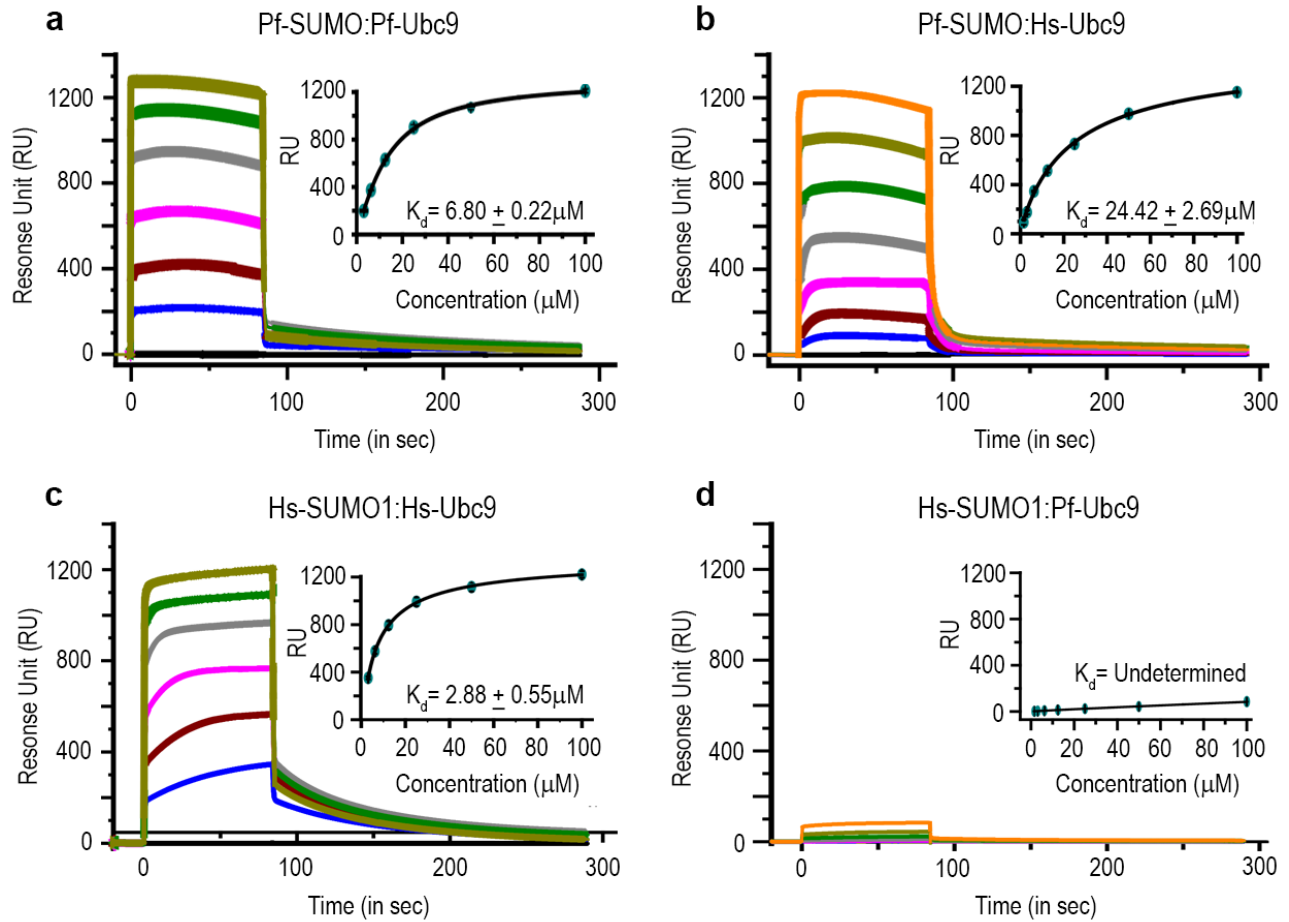

989

990

991 **Supplementary Fig. 2: *Plasmodium* SUMO exhibits strong cross-reactivity with**  
992 **the human Ubc9 enzyme.**

993 Surface plasmon resonance-based binding studies for Pf-SUMO and Hs-SUMO1  
994 interactions with Ubc9 enzymes. **(a and b)** The response unit of Pf-SUMO at different  
995 concentrations of Ubc9 enzyme and curve-fitting by 1:1 binding. **(c and d)** Same as in  
996 (a) and (b), but the Hs-SUMO1 was used instead of Pf-SUMO. The calculated binding  
997 affinities ( $K_d$ ) are indicated for each case. The interactions presented in (a) and (c)  
998 serve as a positive control in these SPR analyses.

999

1000

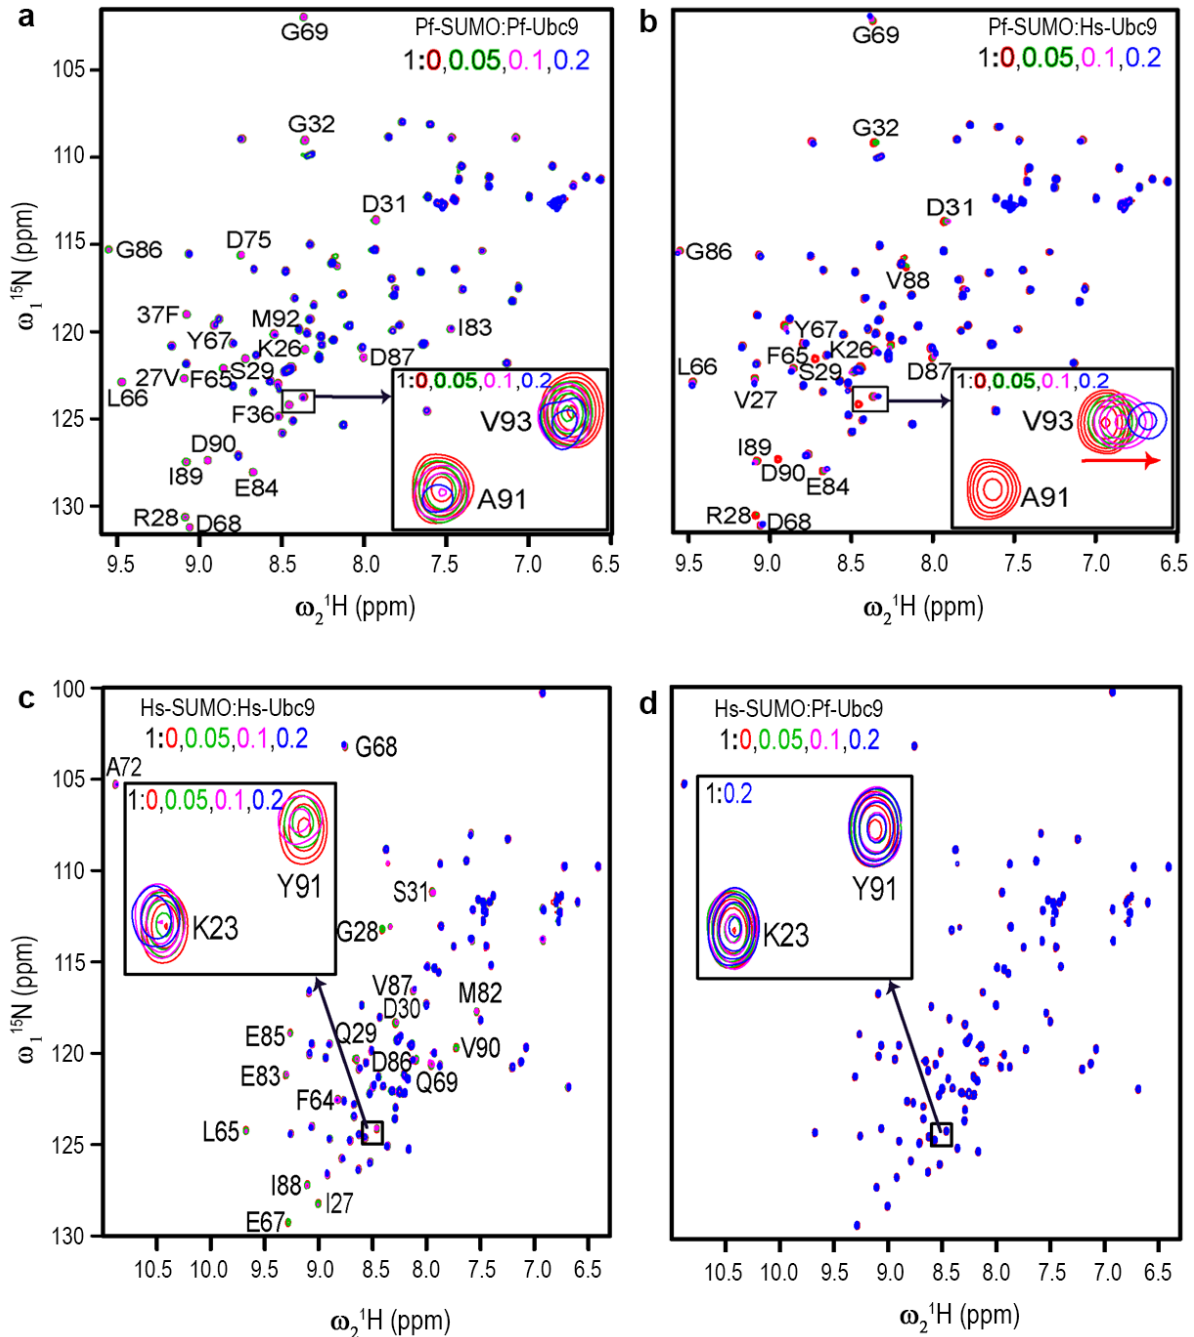

1001

1002

1003 **Supplementary Fig. 3: *Plasmodium* SUMO exhibits strong cross-reactivity with**  
1004 **human Ubc9 enzyme.**

1005 NMR-based titration experiments for Pf-SUMO and Hs-SUMO1 with Ubc9 enzymes. (**a**  
1006 **and b**) Overlay  $^{15}\text{N}$ - $^1\text{H}$  heteronuclear single-quantum coherence (HSQC) spectra of Pf-  
1007 SUMO with Pf-Ubc9 and Hs-Ubc9 enzymes respectively at a ratio of 1: 0.0, 0.05, 0.1,  
1008 0.2 i.e. free state (red colour) to the bound state (0.05, green; 0.1, magenta; 0.2, blue).

1009 The marked amino acid in HSQC spectra indicates the disappeared or shifted residues  
1010 during the course of titration. The insets are excerpts of selected peaks from Pf-SUMO  
1011 interactions as observed. The arrow in the inset indicates the direction of chemical shift  
1012 perturbations. **(c and d)** Same as in **(a and b)**, but the Hs-SUMO1 was used instead of  
1013 Pf-SUMO.

1014



1015

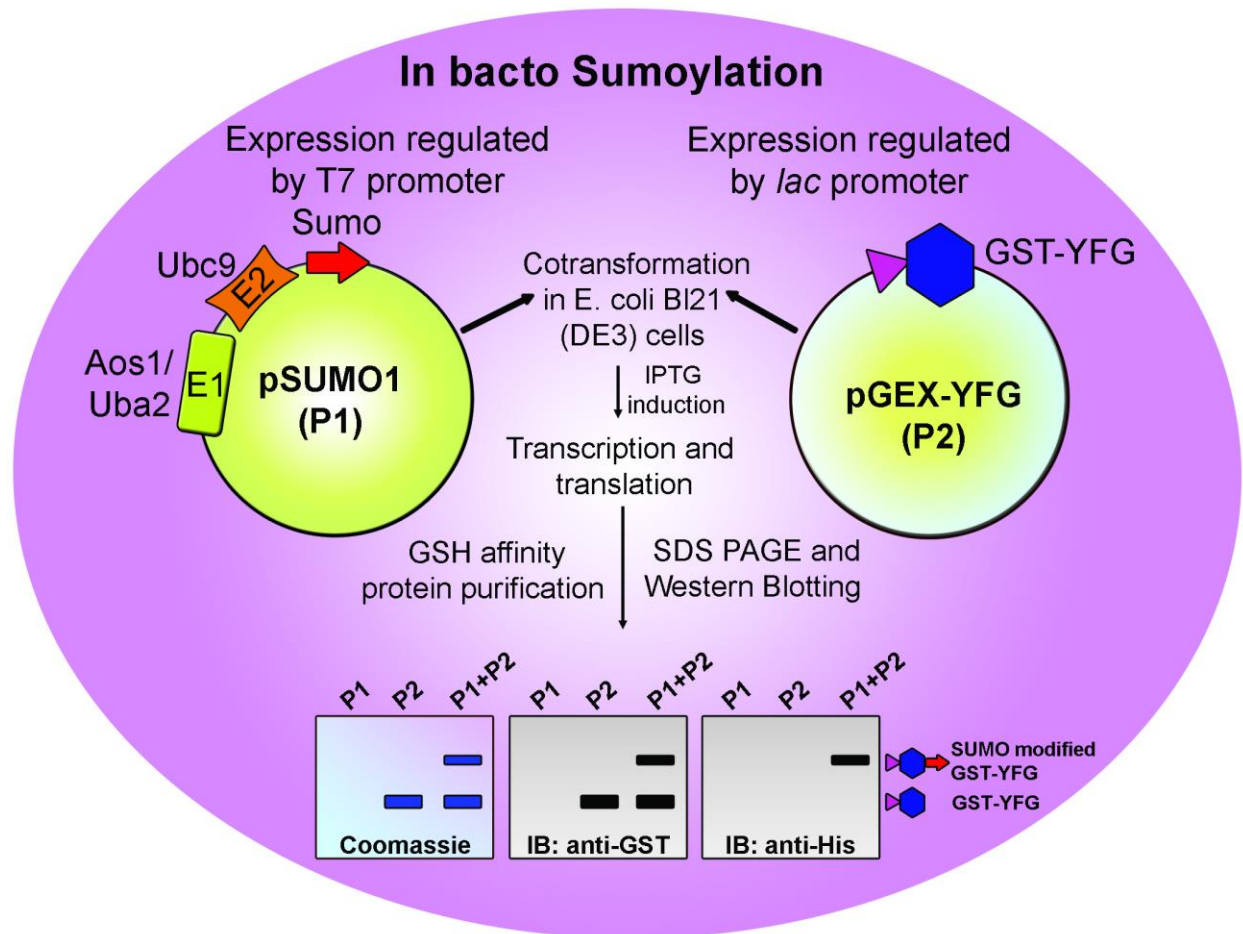

1016

1017

1018 **Supplementary Fig. 4: Illustration of *in bacto* SUMOylation.**

1019 Bacterial expression plasmid vectors, P1 for expressing SUMO1 and E1 and E2  
1020 enzymes of the human SUMOylation pathway, and P2 for expressing GST tagged  
1021 target protein (YFG) into *E. coli* BI21 (DE3) cells. IPTG-based induction allows  
1022 expression of SUMOylation pathway and target proteins. Glutathione (GSH) affinity  
1023 purification enriches unmodified and SUMO-modified target protein from the total  
1024 bacterial lysate. The possible SUMO modification of target protein can be assessed by  
1025 slower migrating bands on coomassie stained SDS-PAGE gel. Further, the modified  
1026 target protein can be detected by anti-GST (recognizing target protein forms) and anti-  
1027 His (recognizing unconjugated SUMO1 and modified target proteins) antibody-mediated  
1028 western blotting methods.

1029

1030

1031

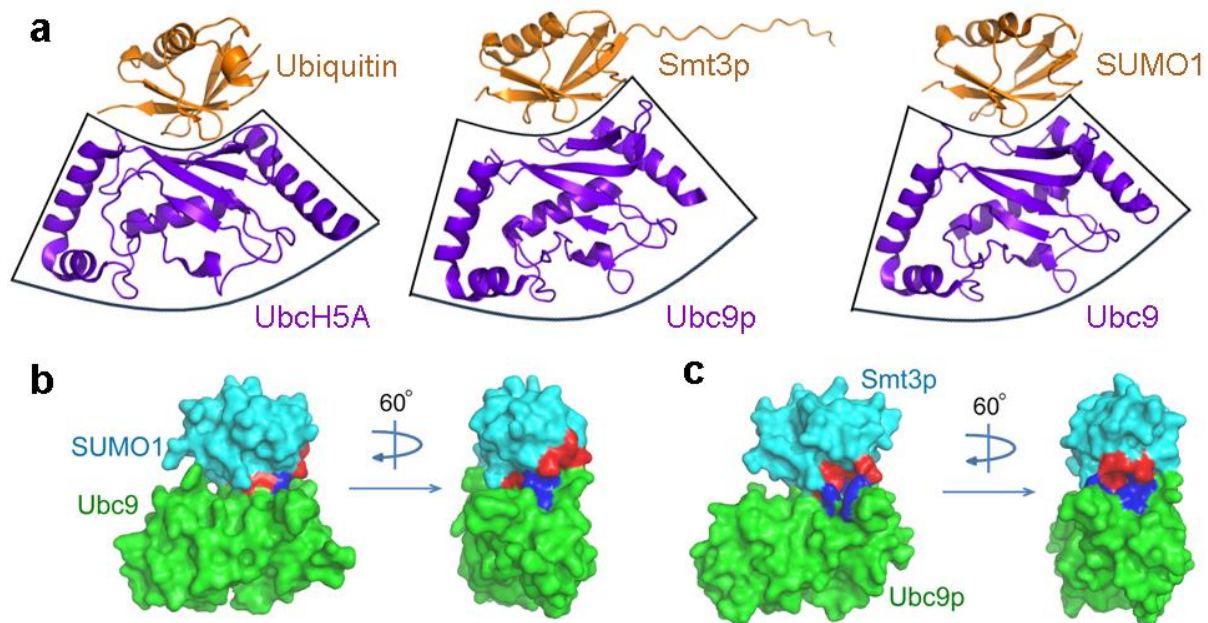

1032

1033

1034 **Supplementary Fig. 5: Shape and charged-based interaction between**  
1035 **SUMO/Ubiquitin and their E2 counterpart.**

1036 **a)** Structural comparison of the interaction between Ubiquitin and UbcH5A (PDB ID:  
1037 3PTF), human SUMO1 and human Ubc9 (PDB ID: 2PE6), and *Saccharomyces*  
1038 *cerevisiae* ubiquitin-like protein Smt3p and Ubc9p (PDB ID: 2EKE) highlights the  
1039 conserved concave-shaped interface between the ubiquitin-like proteins and Ubc9  
1040 across the species. Surface-filled structure of human SUMO1-Ubc9 complex in **(b)**, and  
1041 *S. cerevisiae* Smt3p-Ubc9p complex in **(c)**. The structure has been rotated by 60° to  
1042 highlight the charged residues present at the interface. Interaction in both the complex  
1043 is majorly driven by the electrostatic interaction between the positively charged  
1044 residues, lysine in the Ubc, and negatively charged residues in the SUMO1 and Smt3p  
1045 protein. Only the globular domain of Smt3p is represented in the surface-filled model **(c)**  
1046 for a better representation of the charge-based interaction interface.

1047

1048

1049

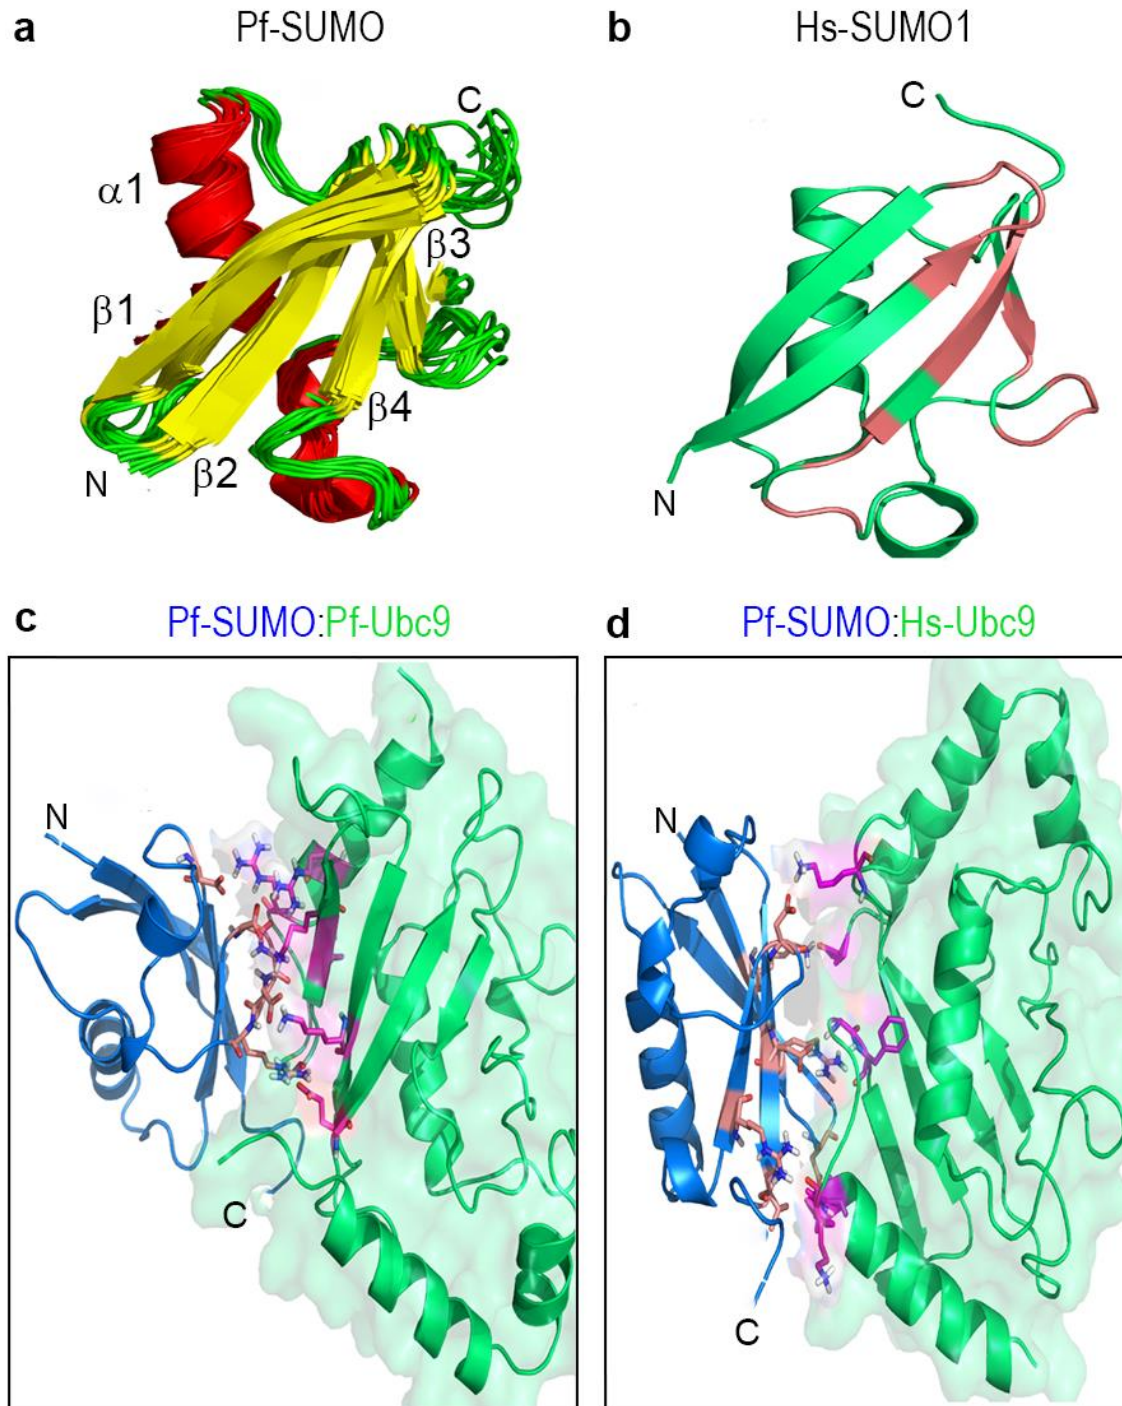

1050

1051

1052 **Supplementary Fig. 6: NMR-derived solution structure of Pf-SUMO and molecular**  
1053 **docking of Pf-SUMO protein with E2 enzymes.**

1054 **a)** Cartoon representation of the ten lowest energy structures of Pf-SUMO. The  
1055 individual  $\beta$ -strands and  $\alpha$ -helices are labeled. The  $\beta$ -strands are  $\beta 1$  (I23-V27),  $\beta 2$  (V35-

1056 I39),  $\beta$ 3 (V63-L66), and  $\beta$ 4 (D87-V93); and  $\alpha$ -helix is at  $\alpha$ 1 (L45-L56). The flexible N-  
1057 terminal tail (1-21) has been deleted in the representation for the sake of clear  
1058 visualizations. **b)** Surface representation of Hs-SUMO1 after binding with Hs-Ubc9  
1059 enzymes. Salmon color regions in the Hs-SUMO structure represent the residues  
1060 involved in interaction with Hs-Ubc9. **c,d)** Docked model of Pf-SUMO and E2 enzymes,  
1061 residues involved in the interaction with Pf-E2 and Hs-E2 enzymes have been  
1062 highlighted. The Pf-SUMO is shown in blue colour, whereas Pf-E2 and Hs-E2 are  
1063 shown in green colour. Interacting residues of Pf-SUMO are in salmon colour, and of Pf-  
1064 E2 and Hs-E2 are in magenta colour.

1065

1066



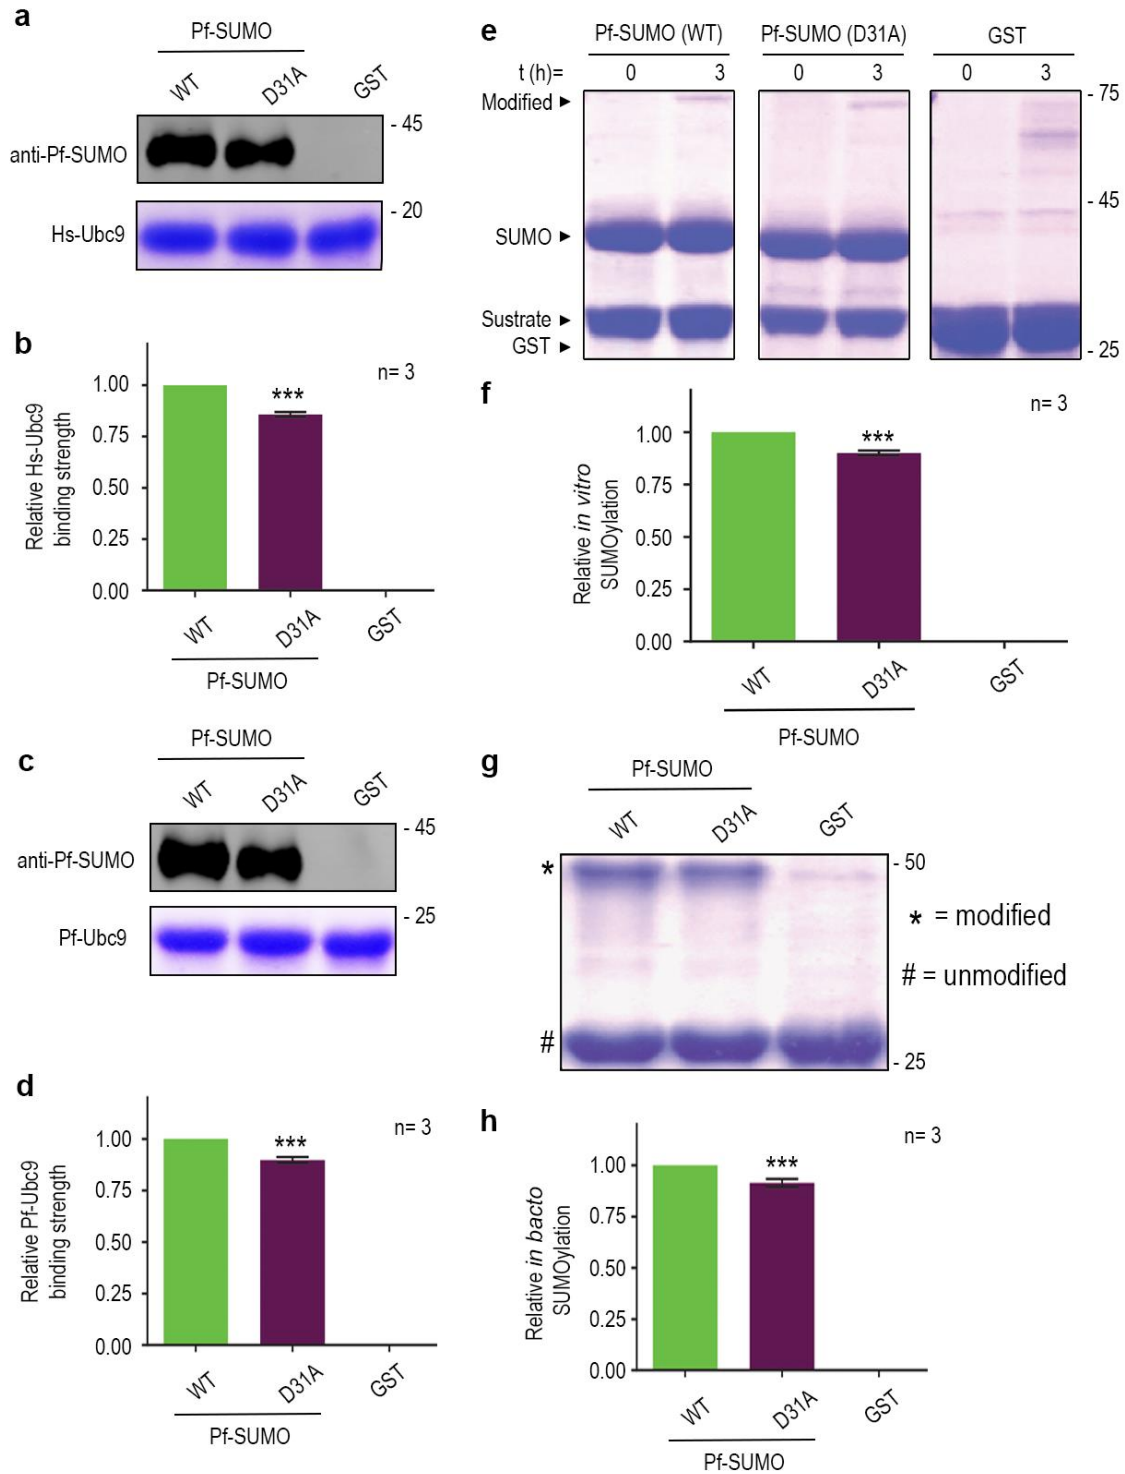

1067

1068

1069 **Supplementary Fig. 7: Alanine mutants of Pf-SUMO D31 and D90 mimic wildtype**  
1070 **interaction and function patterns.**



1071 *In vitro* binding assay of Pf-SUMO D31A mutant protein with Hs-Ubc9 **a)** Upper panels  
1072 indicate anti-Pf-SUMO antibody blotting, and the coomassie stained lower panels  
1073 indicate Hs-Ubc9 levels. **b)** The quantification of SUMO binding as seen in (a). **(c and**  
1074 **d)** Same as in (a and b); however, the binding is performed over the Pf-Ubc9. GST  
1075 serves as a negative control. **e)** *In vitro* SUMOylation with Pf-SUMO wild-type and D31A  
1076 mutant in the presence of purified human SUMOylation machinery components and a  
1077 standard peptide substrate. **f)** The quantification of *in vitro* SUMOylation as seen in (e).  
1078 **g)** *In bacto* SUMOylation with Pf-SUMO wild-type and D31A mutant in the presence of  
1079 human SUMOylation machinery and a standard peptide substrate expressed inside  
1080 bacteria. **h)** the quantification of the *in bacto* SUMOylation seen in (g). In all reactions,  
1081 GST serves as a negative control. All statistical analysis was carried out using  
1082 GraphPad Prism 8.4.3. Column analysis of data sets carried out by One-way ANOVA  
1083 (nonparametric). Dunnett's test was used for multiple comparisons. Family-wise  
1084 significance and confidence level is  $p < 0.001$ .

1085

1086

1087

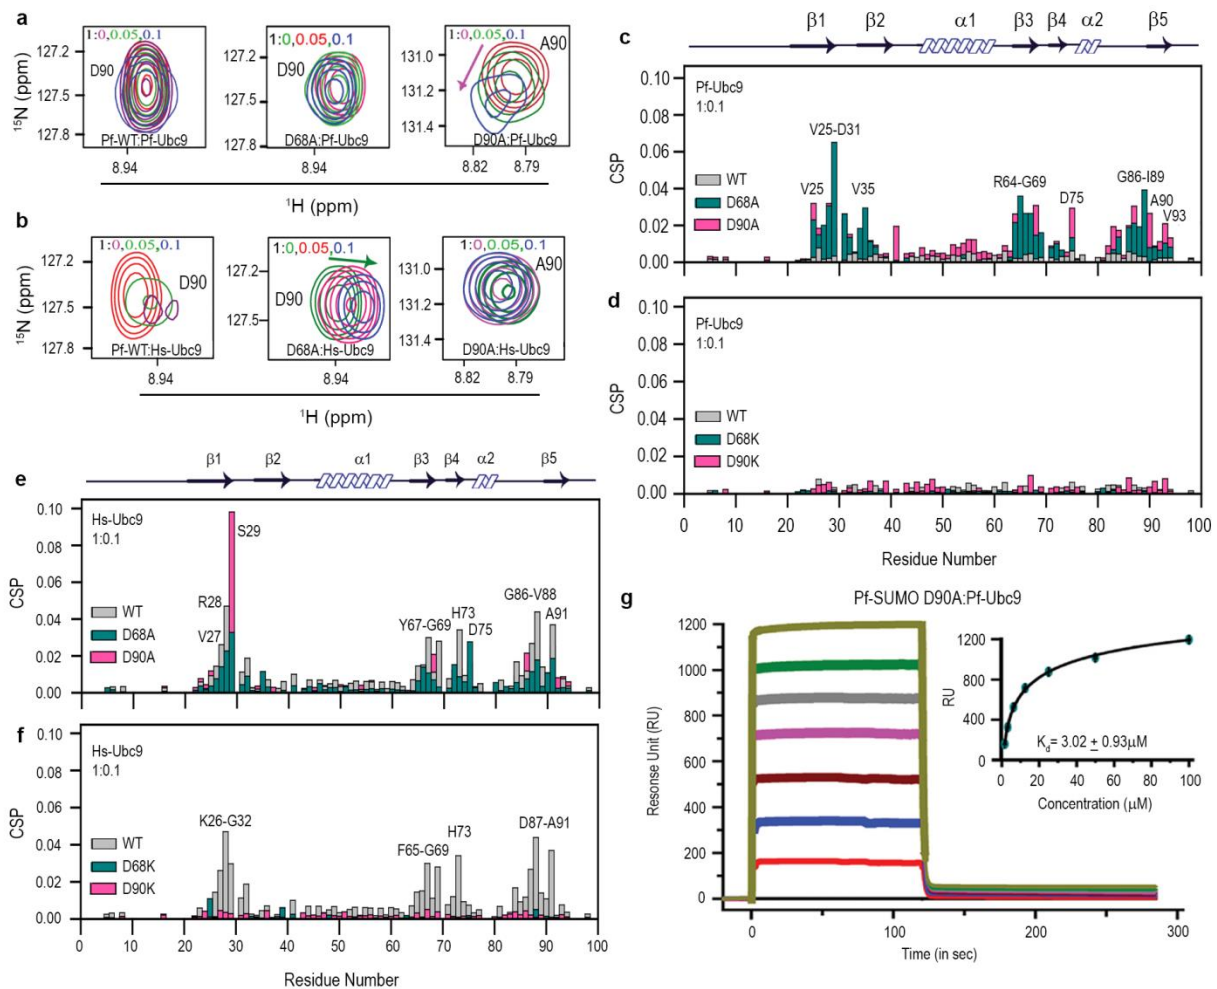

1088

1089 **Supplementary Fig. 8: Negatively charged nodes at Aspartate 68 and 90th**  
 1090 **position govern Pf-SUMO interactions with Ubc9.**

1091 **(a and b)** The excerpts of selected peaks from Pf-SUMO wildtype, Pf-SUMO D68A, and  
 1092 Pf-SUMO D90A mutants with Pf-Ubc9 and Hs-Ubc9. Arrow indicates the direction of  
 1093 chemical shift perturbations. **(c and d)** Chemical shift perturbations (CSPs) of cross  
 1094 amide peaks obtained from  $^{15}\text{N}$ - $^1\text{H}$ -HSQC spectra of Pf-SUMO wild type and D68A,  
 1095 D90A and D68K, D90K mutants in the presence of 0.1 equivalent of Pf-Ubc9,  
 1096 respectively. **(e and f)** Same as in (c and d), but Hs-Ubc9 was used instead of Pf-Ubc9.  
 1097 (Gray, Pf-SUMO; Pink, D90A & D90K; Dark cyan, D68A & D68K). **g)** Surface plasmon  
 1098 resonance-based observation regarding Pf-SUMO D90A mutant's interaction with Pf-  
 1099 Ubc9 enzyme. The response unit of Pf-SUMO at different concentrations of Pf-Ubc9  
 1100 enzyme and curve-fitting by 1:1 binding. The calculated binding affinity ( $K_d$ ) is indicated  
 1101 inside the curve.

1102

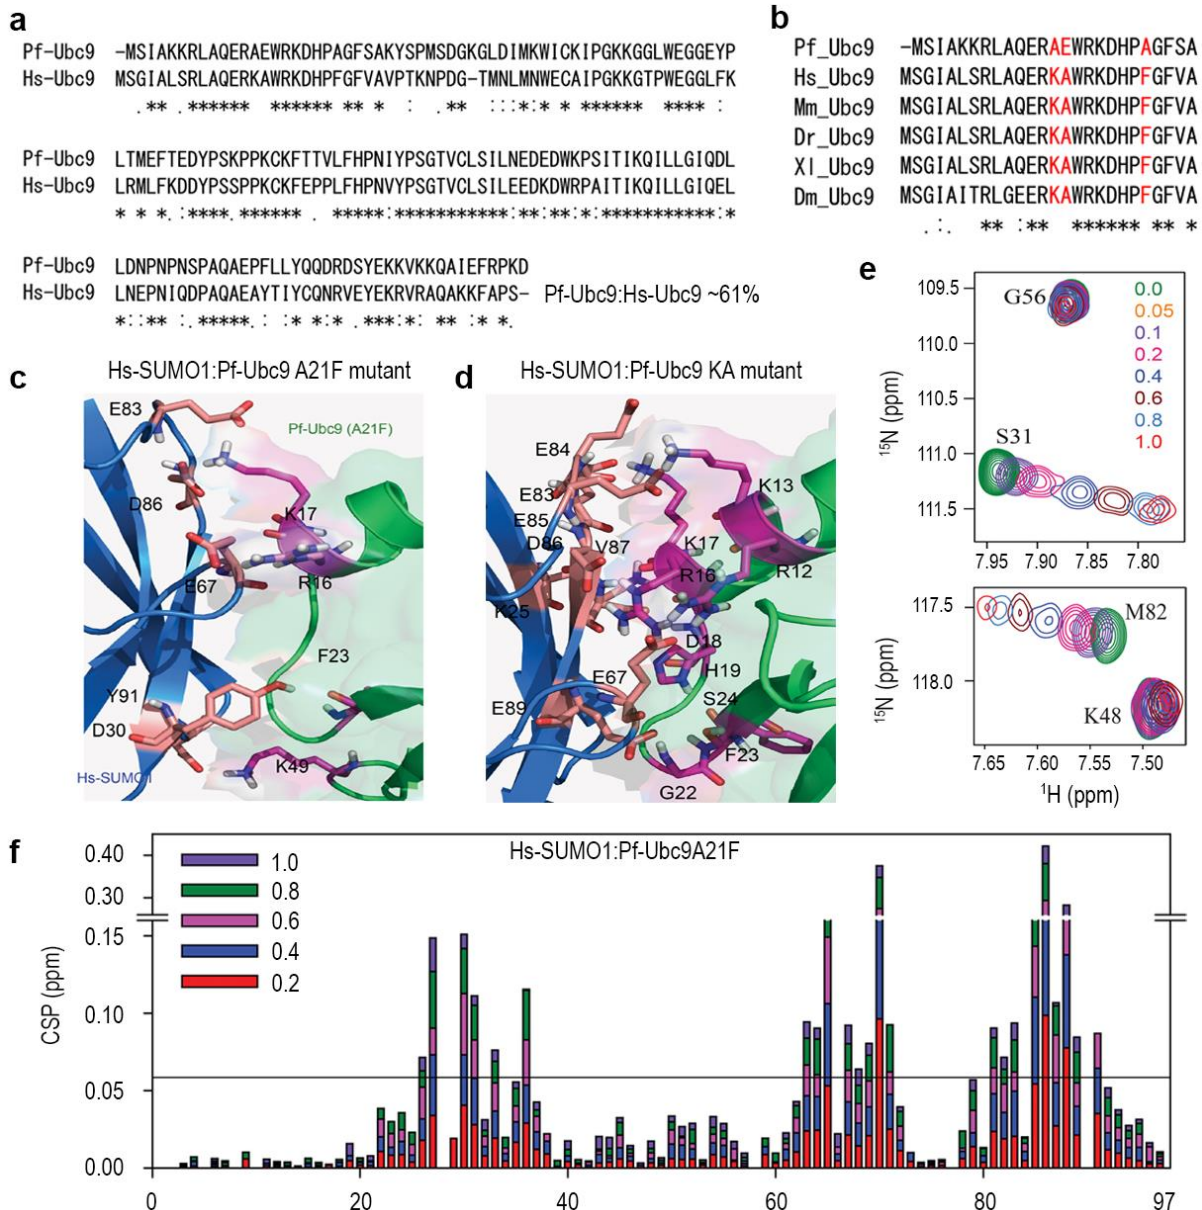

1103

1104

1105 **Supplementary Fig. 9: Changes in the key residues in Pf-Ubc9 N-terminus allows**  
 1106 **interaction with Hs-SUMO1.**

1107 **a)** Alignment of primary sequences of Plasmodium Ubc9 and human Ubc9 highlighting  
 1108 percentage sequence identity. **b)** Sequence alignment of N-terminal SUMO binding  
 1109 region of Ubc9s from different organisms, including Plasmodium. The key difference in  
 1110 Plasmodium Ubc9 is highlighted in red. Docked model of Hs-SUMO1 and Pf-Ubc9  
 1111 mutant interaction interface, Pf-Ubc9A21F mutant **c)** and Pf-Ubc9 KA mutant **d)**. The  
 1112 colour coding for Hs-SUMO1 and Pf-Ubc9 mutants are blue and green, respectively.  
 1113 The interacting residues on Hs-SUMO1 are in salmon color, and the Pf-Ubc9 residues

1114 are in magenta color. **e)** Overlay  $^{15}\text{N}$ - $^1\text{H}$  heteronuclear single-quantum coherence  
1115 (HSQC) spectra of Hs-SUMO1 with Pf-Ubc9 A21F mutant at a ratio of 1: 0.05, 0.1, 0.2,  
1116 0.4, 0.6, 0.8, 1.0 i.e. free state to the bound state. Marked and zoomed view of amino  
1117 acid in HSQC spectra indicates the shifted residues during the interaction. **f)**  
1118 Quantification of CSPs for residues of Hs-SUMO1 upon titration with Pf-Ubc9 A21F  
1119 mutant protein.

1120

1121

1122

1123

1124

1125

1126

## Supplementary Tables

1127

| Thermodynamic Parameters | <i>Pf</i> -SUMO with <i>Pf</i> -E2 | <i>Pf</i> -SUMO with <i>Hs</i> -E2 | D90A with <i>Pf</i> -E2 | <i>Hs</i> -SUMO 1 with <i>Hs</i> -E2 | <i>Hs</i> -SUMO1 with <i>Pf</i> -E2 |
|--------------------------|------------------------------------|------------------------------------|-------------------------|--------------------------------------|-------------------------------------|
| Binding Mode             | One-sites                          | One-sites                          | One-sites               | One-sites                            | One-sites                           |
| N(no. of sites)          | $0.94 \pm 0.006$                   | $1.09 \pm 0.036$                   | $0.88 \pm 0.025$        | $0.96 \pm 0.003$                     | Not quantifiable                    |
| $K_d$ ( $\mu\text{M}$ )  | $4.03 \pm 0.17$                    | $27.42 \pm 1.97$                   | $2.50 \pm 0.97$         | $4.18 \pm 0.95$                      | Not quantifiable                    |
| $\Delta H$ (cal/mol)     | $-6202 \pm 60.11$                  | $-2304 \pm 100.3$                  | $-4639 \pm 169.4$       | $-7072 \pm 38.17$                    | Not quantifiable                    |
| $\Delta S$ (cal/mol/deg) | 3.89                               | 13.1                               | 10.1                    | 0.890                                | Not quantifiable                    |

1128

1129

1130 **Supplementary Table 1: Thermodynamics parameters for SUMO-E2 interactions.**

1131



|                                                  |                      |
|--------------------------------------------------|----------------------|
| Distance restraint list                          |                      |
| Sequential                                       | 245                  |
| Intra-residual                                   | 367                  |
| Medium-range                                     | 342                  |
| Long-range                                       | 461                  |
| Hydrogen bonds                                   | 40                   |
| Dihedral angle restrains ( $\phi$ and $\psi$ )   | 132                  |
| Residual restraints violations                   |                      |
| Average no. of distance violations per structure |                      |
| 0.1-0.2 Å <sup>0</sup>                           | 0                    |
| 0.2-0.5 Å <sup>0</sup>                           | 0                    |
| > 0.5 Å <sup>0</sup>                             | 0                    |
| Model quality                                    |                      |
| RMSD backbone atoms                              | 0.61 Å <sup>0</sup>  |
| RMSD heavy atoms                                 | 1.2 Å <sup>0</sup>   |
| RMSD bond lengths                                | 0.001 Å <sup>0</sup> |
| RMSD bond angles                                 | 0.2 Å <sup>0</sup>   |
| Ramachandran plot statistics                     |                      |
| Most favored region (%)                          | 93.5                 |
| Allowed region (%)                               | 6.5                  |
| Additionally allowed region (%)                  | 0.0                  |
| Disallowed (%)                                   | 0.0                  |
| Global quality scores (raw/Z score)              |                      |
| Verify 3D                                        | 0.28/-2.89           |
| Procheck ( <i>phi-psi</i> )                      | -0.66/-2.28          |
| Procheck (all)                                   | -0.99/-5.85          |
| MolProbity clash score                           | 32.32/-4.02          |
| Target function                                  | 9 -10                |
| Z-score                                          | -2.13                |
| Model contents                                   |                      |
| Total no. of residues                            | 98                   |
| BMRB accession number                            | 36011                |
| PDB ID code                                      | 5GJL                 |

1132

1133 **Supplementary Table 2: Distance restraints lists and structural statistics of 10**  
 1134 **ensemble structures of Pf-SUMO protein.**

| Accession | Description                                                                |
|-----------|----------------------------------------------------------------------------|
| P61604    | 10 kDa heat shock protein, mitochondrial                                   |
| P00441    | Superoxide dismutase [Cu-Zn]                                               |
| Q9H1A4    | Anaphase-promoting complex subunit 1                                       |
| Q12873    | Chromodomain-helicase-DNA-binding protein 3                                |
| Q96T68    | Histone-lysine N-methyltransferase SETDB2                                  |
| Q8N1G1    | RNA exonuclease 1 homolog                                                  |
| Q9NW13    | RNA-binding protein 28                                                     |
| Q13144    | Translation initiation factor eIF-2B subunit epsilon                       |
| Q8N9H8    | Exonuclease mut-7 homolog                                                  |
| Q9NXE8    | Pre-mRNA-splicing factor CWC25 homolog                                     |
| Q9BUQ8    | Probable ATP-dependent RNA helicase DDX23                                  |
| Q9H172    | ATP-binding cassette sub-family G member 4                                 |
| Q9NQW6    | Anillin                                                                    |
| P08133    | Annexin A6                                                                 |
| Q5JR59    | Microtubule-associated tumor suppressor candidate 2                        |
| P02462    | Collagen alpha-1(IV) chain                                                 |
| P29400    | Collagen alpha-5(IV) chain                                                 |
| O14576    | Cytoplasmic dynein 1 intermediate chain 1                                  |
| Q6ZV73    | FYVE, RhoGEF and PH domain-containing protein 6                            |
| Q5JR59    | Microtubule-associated tumor suppressor candidate 2                        |
| P52179    | Myomesin-1                                                                 |
| Q13459    | Unconventional myosin-IXb                                                  |
| Q9BZF9    | Uveal autoantigen with coiled-coil domains and ankyrin repeats             |
| Q5T5Y3    | Calmodulin-regulated spectrin-associated protein 1                         |
| P13612    | Integrin alpha-4                                                           |
| Q8WZ42    | Titin                                                                      |
| Q9Y6R4    | Mitogen-activated protein kinase kinase kinase 4                           |
| Q00975    | Voltage-dependent N-type calcium channel subunit alpha-1B                  |
| O43448    | Voltage-gated potassium channel subunit beta-3                             |
| Q9UMZ3    | Phosphatidylinositol phosphatase PTPRQ                                     |
| O14495    | Phospholipid phosphatase 3                                                 |
| E9PAV3    | Nascent polypeptide-associated complex subunit alpha, muscle-specific form |
| Q7Z494    | Nephrocystin-3                                                             |
| Q7Z417    | Nuclear fragile X mental retardation-interacting protein 2                 |
| P35658    | Nuclear pore complex protein Nup214                                        |
| P62937    | Peptidyl-prolyl cis-trans isomerase A                                      |
| Q96HJ9    | Protein FMC1 homolog                                                       |
| P54198    | Protein HIRA                                                               |
| O43824    | Putative GTP-binding protein 6                                             |
| Q9H3T2    | Semaphorin-6C                                                              |
| Q5T5P2    | Sickle tail protein homolog                                                |
| P31040    | Succinate dehydrogenase [ubiquinone] flavoprotein subunit, mitochondrial   |
| Q9C0C7    | Activating molecule in BECN1-regulated autophagy protein 1                 |
| Q9NT68    | Teneurin-2                                                                 |
| Q8N6K0    | Testis-expressed protein 29                                                |
| Q86UR5    | Regulating synaptic membrane exocytosis protein 1                          |
| P50570    | Dynamin-2                                                                  |
| Q8N3D4    | EH domain-binding protein 1-like protein 1                                 |
| O00471    | Exocyst complex component 5                                                |
| Q9H078    | Caseinolytic peptidase B protein homolog                                   |
| Q8IU81    | Interferon regulatory factor 2-binding protein 1                           |
| Q7Z3B3    | KAT8 regulatory NSL complex subunit 1                                      |
| Q9Y5P6    | Mannose-1-phosphate guanyltransferase beta                                 |
| Q8WXI7    | Mucin-16                                                                   |
| Q7Z5P9    | Mucin-19                                                                   |
| Q9UJL9    | Zinc finger protein 69 homolog B                                           |

1135

1136 **Supplementary Table 3: Proteins identified with significant coverage from GFP-**  
 1137 **trap pull-down using Pf-SUMO and Hs-SUMO1.**
